1 **Both adaptive immunity and IL-1R1 dependent signals improve clearance of cytosolic**  
2 **virulent mycobacteria *in vivo*.**

3

4 **Authors / Affiliations**

5 Sanne van der Niet<sup>1</sup>, Maaïke van Zon<sup>2</sup>, Karin de Punder<sup>2,3</sup>, Anita Grootemaat<sup>1</sup>, Sofie Rutten<sup>1</sup>,  
6 Simone Moorlag<sup>2</sup>, Diane Houben<sup>2</sup>, Astrid van der Sar<sup>4</sup>, Wilbert Bitter<sup>4</sup>, Roland Brosch<sup>5</sup>, Rogelio  
7 Hernandez Pando<sup>6</sup>, Maria T. Pena<sup>7</sup>, Eric A. Reits<sup>1</sup>, Katrin D. Mayer-Barber<sup>8</sup> and Nicole N. van  
8 der Wel<sup>1\*</sup>

9

10

11 **Contact information**

12 <sup>1</sup> Electron Microscopy Centre Amsterdam, Amsterdam University Medical Centre AMC, the  
13 Netherlands, <sup>2</sup> Netherlands Cancer Institute, The Netherlands, <sup>3</sup> Charité - Universitätsmedizin  
14 Berlin, Germany, <sup>4</sup> Amsterdam University Medical Centre VUMC, The Netherlands, <sup>5</sup> Unit for  
15 Integrated Mycobacterial Pathogenomics, CNRS UMR 3525, Paris, France, <sup>6</sup> National Institute  
16 of Medical Sciences and Nutrition, Mexico, <sup>7</sup> Department of Health and Human Services, Health  
17 Resources and Services Administration, Healthcare Systems Bureau, National Hansen's  
18 Disease Programs, Baton Rouge, LA, USA <sup>8</sup> Inflammation and Innate Immunity Unit,  
19 Laboratory of Clinical Immunology and Microbiology, National Institute of Allergy and Infectious  
20 Diseases (NIAID), National Institutes of Health (NIH), Bethesda, USA;

21

22 \*Corresponding author: Nicole van der Wel

23 email address: [n.n.vanderwel@amsterdamumc.nl](mailto:n.n.vanderwel@amsterdamumc.nl)

24

## 25 **Summary**

26 *Mycobacterium tuberculosis* infections claim more than a million lives each year and better  
27 treatments or vaccines are required. A crucial pathogenicity factor is translocation from the  
28 phago-lysosomes to the cytosol upon phagocytosis by macrophages. The translocation from  
29 the phago-lysosome into the cytosol is an ESX-1 dependent process as previously shown *in*  
30 *vitro*. Here we show that *in vivo*, mycobacteria also translocate to the cytosol but mainly when  
31 host immunity is compromised. We observed only low numbers of cytosolic bacilli in mice,  
32 armadillo, zebrafish and patient material infected with *M. tuberculosis*, *M. marinum* or *M.*  
33 *leprae*. In contrast, when innate or adaptive immunity was compromised, as in SCID or IL-1R1  
34 deficient mice, a significant number of cytosolic *M. tuberculosis* bacilli were detected in lungs  
35 of infected mice. Taken together, the cytosolic localization of mycobacteria *in vivo* is controlled  
36 by adaptive immune responses as well as IL-1R1-mediated host resistance to *M. tuberculosis*.

37 **Keywords:** *Mycobacterium tuberculosis*, *Mycobacterium leprae*, *Mycobacterium marinum*,  
38 cytosolic localization, IL-1 receptor 1, phagosome, lysosome, phago-lysosomal fusion.

## 39 **Introduction**

40 *Mycobacterium tuberculosis* (*Mtb*) is not only one of the most deadliest pathogens in history,  
41 but it continues to claim an estimated 1.5 million human lives per year (World Health  
42 Organization, 2019) and is a big threat for the future as multidrug resistant strains are arising  
43 with no effective treatment nor vaccine available. The treatment success rate is just 56% and  
44 in approximately 6.2% of the cases, infection is caused by extensive drug resistant *Mtb* (World  
45 Health Organization, 2019). Furthermore, *Mtb* is the leading cause of death among HIV  
46 infected patients. In patients with AIDS, tuberculosis can thrive because their immune system  
47 is impaired by CD4<sup>+</sup>T cell loss, which secondarily affects many other immune compartments  
48 (reviewed in Doitsh & Greene, 2016).

49 For an effective response to *Mtb* infections, both the innate and the adaptive immune system  
50 are important. The development of an active pulmonary *Mtb* infection is related to a disordered

51 immune balance, which results in the inability of the host to keep the infection under control  
52 (Queval, Brosch, & Simeone, 2017). The first immune response is the innate response  
53 (reviewed in Lerner, Borel, & Gutierrez, 2015) including a series of cells that come in contact  
54 with *Mtb* such as alveolar macrophages. Alveolar macrophages provide a nutritionally  
55 permissive niche (Huang, Nazarova, Tan, Liu, & Russell, 2018) and are critical for  
56 dissemination of the bacteria in the lung, spreading the infection from the alveoli to the  
57 interstitium (Cohen et al., 2018). Here *Mtb* infects other cell types like neutrophils, monocyte  
58 derived macrophages and dendritic cells (DC). Since DCs present antigens via MHC class I  
59 and II to T cells, they function as a connection between the innate and adaptive immune system  
60 (Marino et al., 2004; Sayes et al., 2018). Upon antigen presentation to T cells, CD4<sup>+</sup>T cells  
61 produce IFN $\gamma$ , which is involved in the enhancement of macrophage killing and plays an  
62 important role in granuloma formation (Muruganandah, Sathkumara, Navarro, & Kupz, 2018).  
63 Indeed in mice (Flynn et al., 1993) and humans (Dupuis et al., 2000) loss of IFN $\gamma$  or its  
64 receptors, acting as single non-redundant factor, leads to TB disease. In order to spread to  
65 new individuals, *Mtb* needs to cause pulmonary lesions (Guirado et al., 2015). Inflammation  
66 driven by IL-1 contributes to host resistance to *Mtb* (Bohrer, Tocheny, Assmann, Ganusov, &  
67 Mayer-Barber, 2018; Mayer-Barber et al., 2014). Mice that lack the IL-1R1, IL-1 $\alpha$  or IL-1 $\beta$   
68 display high susceptibility to *Mtb* infection (Mayer-Barber et al., 2011) with uncontrolled  
69 bacterial replication in the lungs, again demonstrating a non-redundant role of one key host  
70 pathway.

71 We hypothesized that bacterial translocation from the phagosome to the cytosol might also be  
72 regulated by IL-1. *In vitro*, *Mtb* can translocate from the phago-lysosome to the cytosol (Houben  
73 et al., 2012; Leake, Myrvik, Wright, & Carolina, 1984; Lerner et al., 2016, 2018, 2020;  
74 Mcdonough, Kress, & Bloom, 1993; Simeone et al., 2012; van der Wel et al., 2007) in an ESX-  
75 1 dependent manner (Houben et al., 2012; Simeone et al., 2012; van der Wel et al., 2007).  
76 This system is responsible for the secretion of a number of proteins, including EsxA (ESAT-6)  
77 and EsxB (CFP-10) (reviewed in Vaziri and Brosch, 2019). When this secretion system is not

78 present, as is the case for *M. bovis* BCG, cytosolic localization is abrogated in *in vitro*  
79 macrophage systems, rendering the bacteria restricted in a membrane enclosed phago-  
80 lysosome. Reintroducing the extended *esx-1* locus in BCG allowed the translocation to the  
81 cytosol and increased virulence providing clear evidence for an essential role of this Type VII  
82 secretion system in escape (Augenstreich et al., 2017; Gröschel et al., 2017; Houben et al.,  
83 2012; Kupz et al., 2016; Pym et al., 2003). In addition, it is shown that virulent *Mtb* can form  
84 cords in the cytosol and not in the phagosome in human lymphatic endothelial cells *in vitro*  
85 (Lerner et al., 2020). This cording is dependent on the ESX-1 secretion system and PDIM  
86 glycolipids. The formation of cords in the cytosol rather than in phagosomes suggests a  
87 permissive environment for bacterial replication in the cytosol. When *Mtb* is present in the  
88 cytosol its bacterial DNA is sensed by cyclic guanosine monophosphate-AMP synthase  
89 (cGAS) (Collins et al., 2015; Majlessi & Brosch, 2015; Wassermann et al., 2015; Watson et al.,  
90 2015). This detection is dependent on the presence of a functioning ESX-1 system, suggesting  
91 that it is dependent on pathogen-induced cytosolic localization. Cytosolic bacteria co-localize  
92 with cytosolic ubiquitin, while this is not the case when the mycobacteria are present in the  
93 phagosome (Houben et al., 2012). Another factor involved in the cytosolic localization is  
94 Rv3167c, which regulates the escape of *Mtb* from the phagosome, since a mutant unable to  
95 produce this protein (*Mtb*ΔRv3167c) displayed increased cytosolic escape (Srinivasan et al.,  
96 2016). Other virulent factors involved in escape from the phagosome are PDIM glycolipids  
97 located on the outer membrane of *Mtb* (Augenstreich et al., 2017; Lerner et al., 2018; Quigley  
98 et al., 2017). Mycobacterial strains that lack PDIM are less capable of damaging the  
99 phagosomal membrane, resulting in less *Mtb* in the cytosol of THP-1 macrophages.

100 While most studies focused on *in vitro* experiments using cultured macrophages, the sub-  
101 cellular localization of *Mtb* and the factors affecting cytosolic localization and pathogenesis are  
102 less intensively studied *in vivo*. When macrophages purified from bronchoalveolar lavages  
103 from TB infected patients were analyzed by electron microscopy, it was found that *Mtb* is  
104 primarily localized in phagosome-like compartments (Mwandumba et al., 2004; Russell,

105 Mwandumba, & Rhoades, 2002). The phagosomal localization does not affect the ability of  
106 *Mtb* to proliferate, and it is long known that when *Mtb* is located in phagosomes it is able to  
107 arrest its maturation (Armstrong & D'Arcy Hart, 1971; Sturgill-Koszycki et al., 1994) up to 5-7  
108 days (Sundaramurthy et al., 2017). More recently, it was shown *in vivo* that *Mtb* is able to  
109 translocate to the cytosol as early as three hours post infection using a Förster resonance  
110 energy transfer (FRET)-based detection system (Simeone, Sayes, Song, Gröschel, & Brodin,  
111 2015). This study also demonstrated that the pH of the lysosomes plays a role in the cytosolic  
112 localization; when the lysosome is more acidic, less *Mtb* is present in the cytosol at 3 days post  
113 infection (Simeone et al., 2015).

114 To examine whether activation via adaptive or innate immunity pathways would affect the  
115 capability of mycobacteria to translocate into the cytoplasm *in vivo*, we tested the subcellular  
116 localization of different mycobacterial species in zebrafish, armadillo and mice models as well  
117 as in patient material. In adult zebrafish and zebrafish embryos we used *M. marinum*, a close  
118 homologue of *Mtb* that is also known to escape the phago-lysosome in an ESX-1 dependent  
119 manner (Stamm et al., 2003). *M. leprae* is also known to escape to the cytosol (van der Wel et  
120 al., 2007), probably using a similar mechanism, although some of the members of ESX-1  
121 system (like *esxC*, *esxG*, *esxS*) are pseudogenes, it has functional ESAT-6 (*esxA*) and CFP-  
122 10 (*esxB*), the two most important components needed for cytosolic escape. We used both  
123 skin biopsies of leprosy patients and the armadillo model for *M. leprae* since, the armadillo  
124 model is known to exhibit the entire clinical spectrum of leprosy (Sharma et al., 2013). For *Mtb*  
125 both SCID mice that lack both T and B cells, and IL-1R1 knockout mice were compared to  
126 determine their ability to limit cytosolic escape *in vivo* in infected cells. Here we show that while  
127 cytosolic localization is limited by both innate and adaptive immunity, IL-1 seems to be a key  
128 effector pathway in controlling cytosolic translocation of *Mtb*.

129

130 **Results**

131

132 **The pH of the phagosome and lysosome does not affect cytosolic localization of *M.***  
133 ***marinum*.**

134 *Mtb* blocks maturation and acidification of the phago-lysosome, promoting its intracellular  
135 survival (Armstrong & D'Arcy Hart, 1971; Clemens, Lee, & Horwitz, 2000; Russell, Vanderven,  
136 Glennie, Mwandumba, & Heyderman, 2009; Sturgill-Koszycki et al., 1994; Wong, Bach, Sun,  
137 Hmama, & Av-gay, 2011). Phagosomal acidification is essential for increased activity of the  
138 lysosomal digestive process and thus for degradation of its content (Vieira, Botelho, &  
139 Grinstein, 2002). *Mtb* partially avoids acid mediated killing by blocking fusion between  
140 lysosomes and phagosomes (Mwandumba et al., 2004; Sturgill-Koszycki et al., 1994) and the  
141 secretion of antacid known as 1- tuberculosinyladenosine (TbAd) (Buter et al., 2019). In  
142 addition, it is shown that the mycobacterial cell wall plays a role in the resistance to acidic  
143 environments (reviewed in Vandal et al., 2009). We hypothesized that cytosolic escape is a  
144 fourth mechanism to avoid lysosome mediated killing. To determine whether these  
145 mechanisms are interdependent, we examine if the phagosomal pH affects translocation from  
146 the phagosome to the cytosol. To exclude the effect of TbAd, we utilized *M. marinum*, which  
147 does not express TbAd (Young et al., 2015) in THP-1 cells. The acidity of the phagosome and  
148 the lysosome was measured using lysotracker and by incubation with (N-(3-((2,4-  
149 dinitrophenyl)amino)propyl)-N-(3-aminopropyl) methylamine (DAMP), a weak basic amine that  
150 will be taken up by acidic organelles in live cells (Mwandumba et al., 2004). After fixation and  
151 sample preparation, the DAMP was visualized by Transmission Electron Microscopy (TEM)  
152 using immuno-gold labelling with  $\alpha$ DNP antibody conjugated to a gold particle. The more acidic  
153 the phagosome or lysosome, the more DAMP was present, thus resulting in a higher label  
154 density in acidic organelles. As expected, upon *M. marinum* infection of THP-1 cells, low  
155 amounts of DAMP labelling were observed surrounding cytosolic *M. marinum* (Supplemental  
156 Figure 1A/1A') while more labeling was detected in *M. marinum* containing phagosomes

157 (Supplemental Figure 1A/1A"). We next blocked acidification with 10nM Concanamycin B  
158 (ConB), an inhibitor of vacuolar ATPases which prevents acidification of endosomes and  
159 lysosomes. When cells were treated with ConB and infected with *M. marinum*, both a lower  
160 label density was measured and the lysotracker imaged with fluorescence microscopy confirm  
161 that the pH is less acidic in the phagosome/lysosome when treated with ConB as already well  
162 described (Crowle, Dahl, Ross, & May, 1991; Mwandumba et al., 2004) (Supplemental Figure  
163 1B). We next examined whether a raising pH would affect the translocation efficiency of *M.*  
164 *marinum* to the cytosol. The percentage of cytosolic bacteria in THP-1 cells treated with ConB  
165 or no treatment control was determined both at 24h and 48h after infection with *M. marinum*,  
166 which is the known timeframe for escape (Houben et al., 2012) (Figure 1A,B). The number of  
167 bacteria present in CD63 labeled compartments (phago-lysosomal), membrane enclosed but  
168 not CD63 positive compartments (phagosomes) and the number of bacteria in the cytosol were  
169 counted (Supplemental Figure 2A). At both 24h and 48h after infection no difference in the  
170 percentage cytosolic bacteria was detected for untreated or ConB treated cells. This indicates  
171 that a higher pH has no effect on *M. marinum* translocation to the cytosol. In conclusion, a  
172 raised lysosomal pH has no effect on the percentage of bacteria translocating to the cytosol in  
173 THP-1 cells.

174

#### 175 ***M. marinum* translocates to the cytosol in embryonic but not adult zebrafish.**

176 After studying the effect of the pH on the ability of *M. marinum* to translocate to the cytoplasm  
177 *in vitro*, we next focussed on the subcellular localisation *in vivo*. To address whether either  
178 adaptive or innate immunity was required to limit bacterial cytosolic escape we used a  
179 zebrafish model combined with *M. marinum* infection. Among other age-related differences,  
180 zebrafish larvae do not have a fully developed adaptive immune system in contrast to adult  
181 zebrafish (Langenau et al., 2004). Zebrafish embryos and adult zebrafish were infected with  
182 *M. marinum* or *M. marinum* Tn::ESX5 mutant and tissue was fixed for TEM analysis. For  
183 analysis of adult zebrafish a specific *M. marinum* Tn::ESX5 mutant was used as this infection



184 was shown to cause hypervirulence (Weerdenburg et al., 2012) and thus large amounts of  
185 bacteria can be detected *in vivo* using TEM. The following conditions were analysed using  
186 TEM: whole zebrafish embryo day 9 and the spleen of adult zebra fish at day 11 (Figure 2A,B).  
187 The percentage of cytosolic *M. marinum* was determined by counting the number of  
188 mycobacteria in a membrane enclosed compartment and in the cytoplasm. Discrimination  
189 between phagosome and phago-lysosome based on immuno-gold labelling with lysosomal  
190 markers available in humans or mice (CD63, LAMP1) was not possible as no lysosomal  
191 markers are available for immuno-gold labelling in zebrafish. Alternatively, actin antibodies  
192 were used as a cellular cytoskeleton marker. In embryos infected for 9 days 32% of *M.*  
193 *marinum* was present in the cytosol (Figure 2C and Supplemental Figure 2B). Out of the four  
194 adult zebrafish analyzed, one was discarded as no bacteria could be detected. In the other  
195 three fish ample bacteria were detected and categorized as phagosomal or cytosolic based on  
196 the presence of membrane. In adult zebrafish less than five percent of the bacteria were found  
197 in the cytosol (Figure 2C). Thus, adult but not embryo zebrafish were able to limit bacterial  
198 cytosolic escape. This outcome suggests the presence of an adaptive immune system  
199 promotes bacterial containment in the phago-lysosome, although other age related factors  
200 could be at play.

201

### 202 **Cytosolic localization of *M. leprae* is restrained in both armadillo and patient skin**

203 To examine whether cytosolic localization can only be detected in early, innate stages of  
204 infections, we used another model organism; *M. leprae*, the causative agent for leprosy. Like  
205 *Mtb*, these bacteria have been shown to translocate to the cytosol in an *in vitro* model (van der  
206 Wel et al., 2007). We studied early (day 3) and late stage (day 21) infections in armadillos and  
207 in addition, biopsies were taken from 4 lepromatous leprosy (LL) patients with a well-  
208 established infection. The skin of the abdomen of armadillos was infected with both unviable  
209 (irradiated) as well as viable *M. leprae*. At the site of infection, loss of pigment was visible which  
210 increased during infection progression (Figure 3A and B). No differences were observed in  
211 loss of pigment between the sites infected with irradiated *M. leprae* and viable *M. leprae*. At



212 the border of pigment loss, armadillo skin biopsies infected with viable *M. leprae* were fixed for  
213 TEM analysis, to determine if the localization of the bacteria is cytosolic versus phagosomal.  
214 Immuno-gold labelling against *M. leprae* specific anti-Cell Wall Protein was used to verify that  
215 these are indeed mycobacteria. Similar to the localization of *M. marinum* in adult zebrafish, the  
216 majority of the bacteria were present in membrane enclosed phagosomes and cytosolic  
217 bacteria were only occasionally detected at both day 3 (Figure 3C) and 21 after infection. In  
218 addition, skin biopsies of 4 different lepromatous leprosy patients taken from the border of the  
219 infection as defined by the depigmentation line and were analyzed using TEM and immuno-  
220 gold labelling for *M. leprae* specific anti-Cell Wall Protein and lysosomal markers such as  
221 Cathepsin D (Figure 4), LAMP1, and CD63. From the 4 patients, individual bacteria were  
222 detected and classified for their subcellular localization based on the presence of surrounding  
223 membrane and 2 or more gold particles detecting Cathepsin D (Supplemental Figure 2C).  
224 Similar to the armadillo and adult zebrafish, the percentage of cytosolic mycobacteria was low  
225 (1.1%), while over 700 bacilli were assessed. In conclusion, in both armadillo and human skin,  
226 a low percentage of cytosolic *M. leprae* bacteria is present at all measured stages of infection.

227

228 **Immunocompetent BALB/c, but not SCID mice can contain *M. tuberculosis* inside**  
229 **phagosomes of infected pulmonary cells.**

230

231 After showing that neither *M. leprae* nor *M. marinum* translocate in high numbers to the cytosol  
232 even at later stages of infection, we next wanted to study the subcellular localization of *M.*  
233 *tuberculosis* longitudinally in mice. To do so BALB/c mice were infected with the virulent *Mtb*  
234 strain H37Rv and lung tissue was fixed for EM analysis at day 2, 7, 21, 45 and 120 after  
235 infection. These samples were immunogold labelled for lysosomes using LAMP1 or Cathapsin  
236 D and imaged using TEM (Figure 5). As for *M. marinum* in THP1 cells and *M. leprae* in skin,  
237 the number of bacteria present in LAMP-1 labeled phago-lysosomes, membrane enclosed but  
238 not LAMP-1 labelled phagosomes and the number of bacteria in the cytosol were counted  
239 (Supplemental Table 1). We found that cytosolic localization was highest at day 7 of infection,

240 with still less than five percent of *Mtb* detectable in the cytosol and most bacteria residing in a  
241 membrane enclosed compartment. To determine if patient derived strains behave similar to  
242 H37Rv, BALB/c mice were infected with two additional *Mtb* strains from lineage 2, often  
243 referred to as Beijing family *Mtb* (1998-1500 ancient Beijing) and multi drug resistant strain  
244 (2002-0230 Beijing). EM analysis was done at 21, 45 and 120 dpi and demonstrated also low  
245 amounts cytosolic bacteria (Supplemental Table 1). Thus, as shown previously in immune-  
246 competent mice, different strains of *Mtb* reside primarily inside membrane enclosed  
247 compartments and not inside the cytosol.

248

249 To directly address a potential contribution of the adaptive immune system we next quantified  
250 *Mtb* cytosolic translocation in SCID mice. SCID mice lack functional T and B cells, key  
251 mediators of adaptive immunity in vertebrates and succumb rapidly to *Mtb* infections. SCID  
252 mice were infected with *Mtb* strain H37Rv via aerosol and killed 21 days after infection. Lungs  
253 were then fixed and processed for EM analysis and sections labelled for LAMP1 using immuno-  
254 gold labelling to indicate lysosomes and phago-lysosomes (Supplemental Table 1). We  
255 detected a 10-fold increase in *Mtb* cytosolic translocation in SCID compared to BALB/c mice,  
256 arguing that T and B cells are required for optimal exclusion of bacilli from the cytosol of  
257 infected cells.

258

### 259 ***Mtb* is preferentially located in the cytosol of infected pulmonary cells in IL-1R1 deficient** 260 **mice**

261 IL-1 is a potent innate inflammatory cytokine critically required for resistance against bacterial  
262 infections. Mice deficient in the IL-1 pathway, such as IL-1 $\alpha$  and IL-1 $\beta$  are highly susceptible  
263 to *Mtb* infection with increased mortality and bacterial growth in lung and spleen and  
264 development of necrotic granulomatous lesions that more closely resemble human necrotic  
265 lesions (Juffermans et al., 2000; Mayer-Barber et al., 2011, 2014, 2010; Yamada, Mizuno,  
266 Horai, Iwakura, & Sugawara, 2000). To investigate the contribution of this innate immune  
267 pathway in the prevention of mycobacterial cytosolic escape, we infected *Il1r1*<sup>-/-</sup> and B6 WT

268 mice with *Mtb* and 4 weeks after infection fixed lung tissue and processed it for TEM analysis.  
269 As *Mtb* is normally difficult to find, first fluorescence microscopy was performed and tissues  
270 were sectioned at 200 nm and stained for detection of nuclei and mycobacteria (Figure 6 A,B)  
271 to be able to select for the infected area (van Leeuwen et al., 2018). Whereas in B6 mice only  
272 small spots of *Mtb* are detected (like for BALB/c mice), infected *Il1r1*<sup>-/-</sup> tissue is heavily labelled  
273 and thus infected. Ultrathin sections were labelled for LAMP1 and CD63 using immuno-gold  
274 labelling to indicate lysosomes and phago-lysosomes for TEM analysis. As before, difference  
275 between phago-lysosomal, phagosomal and cytosolic *Mtb* was determined based on the  
276 presence of immuno-gold labelling and a membrane surrounding the bacteria (Figure 6C,D  
277 and Supplemental Figure 2D). *Mtb* was found in the phago-lysosome, the phagosome and in  
278 the cytosol. Strikingly, we detected a 14-fold increase in the number of *Mtb* translocated to the  
279 cytosol in *Il1r1*<sup>-/-</sup> deficient lungs compared to WT B6 lungs infected with *Mtb*. While only 2.5%  
280 of *Mtb* bacilli were located in the cytosol in the lungs of infected WT B6 mice, over 30% of the  
281 *Mtb* bacilli in the lung were able to escape to the cytosol in the absence of IL-1 signaling. Thus,  
282 IL-1 dependent signals are required to prevent cytosolic localization of *Mtb*.

## 283 Discussion

284 The cytosolic localization of mycobacteria has been debated ever since the first description in  
285 the late 1980s (Leake et al., 1984; McDonough et al., 1993; Myrvik, Leake, & Wright, 1984).  
286 Our immuno-gold TEM analysis of *Mtb*, BCG and mutant strains in 2007 (van der Wel et al.,  
287 2007) restarted the discussion and several studies have now confirmed the presence of extra-  
288 phagosomal *Mtb* bacilli (Houben et al., 2012; Simeone et al., 2012, 2015). In addition, the  
289 release of DNA into the cytosol was described and is, like escape from the phagosomal  
290 compartment, dependent on the ESX-1 secretion system (Collins et al., 2015; Wassermann et  
291 al., 2015; Watson et al., 2015). In this study, we showed that *in vivo*, *Mtb* is mainly present in  
292 membrane bound compartments and not in the cytosol of infected cells. This also holds true  
293 for the pathogenic mycobacteria, *M. leprae* and *M. marinum*.

294 Here, we showed that raising the lysosomal pH did not affect cytosolic localization of *M.*  
295 *marinum*. In THP-1 cells, *M. marinum* can escape irrespective of the raised pH of the lysosome.  
296 As well-known already, maturation of the *Mtb* phagosome is altered (Armstrong & D'Arcy Hart,  
297 1971; Clemens et al., 2000; Russell et al., 2009) and our data suggest that the pH of  
298 phagosomes has no effect on translocation. Simeone and colleagues (2015) showed *in vivo*  
299 that when phagosomal acidification was blocked using bafilomycin, an induction of  
300 mycobacterial access to the cytosol is detected. Therefore, we hypothesized that raising the  
301 phagosomal and lysosomal pH by ConB would result in increased cytosolic localization of *M.*  
302 *marinum*. However, we found at a cellular level, no difference in the percentage of cytosolic *M.*  
303 *marinum*. Our cell-culture derived data merely demonstrate that mycobacteria can translocate  
304 irrespective of the pH, and thus manipulation of the pH by ConB did not change the subcellular  
305 localization in cells under *in vitro* conditions. Importantly, *in vivo*, as studied here and by  
306 Simeone et al., (2015), subcellular localization of mycobacteria is a highly complex and  
307 dynamic process.

308 After inhalation in the lung, *Mtb* is initially taken up by alveolar macrophages and spreads  
309 among innate immune cells while delaying the initiating adaptive immunity (Mayer-Barber &  
310 Barber, 2015; Rothchild et al., 2019; Samstein et al., 2013). Importantly, both innate and  
311 adaptive immunity are critically important for optimal host resistance against *Mtb*. Here, we  
312 show that while the lysosomal pH itself has a minimal role, effective adaptive and innate host  
313 immunity play a critical role in preventing mycobacterial escape to the cytosol. The delicate  
314 balance between bacterial replication and containment by the host immune response is lost  
315 when immunity is compromised by either lack of T and B cells in SCID mice, or even more  
316 dramatically, in the absence of innate IL-1R1 signaling. Of note, the profound increase in IL-  
317 1R1 deficient mice exceeds moderate but significant increase in SCID mice, even though the  
318 former likely has a broader set of immunological defects. This may argue that despite  
319 increased susceptibility to *Mtb*, certain specific immune pathways like IL-1 may be more  
320 directly and preferentially involved in regulating cytosolic escape. In line with our observations

321 in SCID and IL-1R1 deficient mice, we further propose that *Mtb* has a limited ability to escape  
322 to the cytoplasm when the immune system is intact. However, this limited ability still results in  
323 rare cytosolic escape events, which likely may lead to activation of cytosolic  
324 immunosurveillance pathways, including those linked to IL-1, which promote rapid clearance  
325 by the immune cells attracted to infected cells.

326 Cytosolic immunosurveillance pathways are triggered by pathogens directly or by pathogenic  
327 products entering the cytosol, and are often linked to anti-viral immunity and type I IFN  
328 induction as well as inflammasome activation. Inflammasomes are cytosolic signaling  
329 complexes that ultimately lead to cytolytic cells death and IL-1 family cytokine processing. It is  
330 now established that bacterial DNA can translocate to the cytosol, in an ESX-1 dependent  
331 manner, where it is detected by cytosolic DNA sensors such as cGAS and AIM2 (Collins et al.,  
332 2015; Kupz et al., 2016; Wassermann et al., 2015; Watson et al., 2015) cGAS in turn  
333 synthesizes a second messenger (cGAMP) which activates the STimulator of IFN Genes  
334 (STING) and type I IFN signaling and expression of IFN- $\alpha$  and  $\beta$  (reviewed in Chen et al.,  
335 2016). When cytosolic DNA is detected by AIM-2, the NRLP3 inflammasome is activated and  
336 leads to proteolytic cleavage of IL-1 $\beta$  (Collins et al., 2015; Kupz et al., 2016; Wassermann et  
337 al., 2015; Watson et al., 2015). We have previously shown that IL-1 and type I IFNs exhibit  
338 potent cross regulation important for host resistance against *Mtb* with excessive type I IFN  
339 induction in the absence of IL-1 signaling (Ji et al., 2019; Mayer-Barber et al., 2011, 2014).  
340 The elevated type I IFNs expression in the absence of IL-1 contributed to the increased  
341 susceptibility of the *Il1r1*<sup>-/-</sup> mice, as mice doubly deficient in IL-1R1 and IFNAR1 displayed  
342 increased resistance (Mayer-Barber et al., 2014). Our new findings here of increased cytosolic  
343 *Mtb* in *Il1r1*<sup>-/-</sup> mice provide a possible molecular explanation for the increased type I IFN  
344 production previously reported. Future studies need to elucidate the exact mechanisms how  
345 IL-1 mediates bacterial containment in phago-lysosomes. In this context, our recent study  
346 demonstrated that infected cells themselves do not need to express IL-1R1 *in vivo* to mediate  
347 host resistance and that IL-1R1 expression coordinates immune responses in multiple cells

348 types (Bohrer et al., 2018). Along these lines, it has been proposed that IL-1R1 on non-immune  
349 cells was required for the ability of infected alveolar macrophage to leave the airway to  
350 establish infection in the interstitial lung space (Cohen et al., 2018). Thus, cytosolic  
351 containment of bacilli in infected cells, may not require direct cell-autonomous antimicrobial  
352 signaling pathways but may be the result of dynamic cellular interactions between infected  
353 cells and cells of both non-hematopoietic and bone marrow origin.

354 Overall, this study establishes that high level cytosolic escape of mycobacteria can indeed  
355 occur *in vivo*, but mainly when host resistance is compromised. When B and T cells are not  
356 functional in SCID mice or the complete adaptive immune system is abrogated, like in zebrafish  
357 embryos, a substantial percentage of mycobacteria is detected in the cytosol as compared to  
358 immunocompetent hosts. Strikingly, the highest proportion cytosolic *Mtb* was observed in mice  
359 lacking IL-1 signaling. This argues that the IL-1 pathway is crucial for the control of the number  
360 of cytosolic mycobacteria and likely IL-1 mediated resistance to *Mtb*.

361

## 362 **Methods**

### 363 *Bacteria*

364 *M. marinum* E11 strain was grown on Middlebrook 7H10 plates supplemented with OADC. A  
365 single colony was inoculated into 7H9 liquid medium (BD) supplemented with 10% ADC and  
366 0.05% Tween 80 and incubated with shaking at 30°C and grown to an OD600 of 0.6-1. Before  
367 infection the bacteria were centrifuged at 750 rpm to remove clumps, leaving a bacterial  
368 suspension.

### 369 *Inhibiting acidification*

370 Inhibition of acidification of phagosomes/lysosomes in THP-1 cells treated with Concanamycin  
371 B (ConB) (Alexis Biochemicals: 380098C100) was assessed by confocal microscopy. THP-1  
372 macrophages were grown in Roswell Park Memorial Institute (RPMI)-1640 medium

373 supplemented with 10% FCS and ConB was added to the cells in different concentrations 1h  
374 and 24h before fixation. The concentration 10nM of ConB strongly inhibited acidification and  
375 did not affect THP-1 cell viability after a 48h incubation period. THP-1 cells were washed 3  
376 times with RPMI-1640 10% FCS medium and kept as a control or pretreated with 10nM ConB  
377 for 1 hour. Cells were infected with *M. marinum* (MOI 10:1) in the presence or absence of the  
378 acidification inhibitor. After an incubation time of 1 hour at 32°C, cells were washed 3 times  
379 with culture medium without antibiotics and with or without acidification inhibitors to remove  
380 extracellular bacteria. After washing, the cells were further incubated in culture medium with  
381 or without ConB for 24 or 48 hours at 32°C prior to fixation. Fixed samples were prepared for  
382 cryo-immunogold microscopy, sectioned for EM and immuno-gold labeled with CD63. To  
383 assess the effect on the amount of cytosolic *M. marinum*, from 3 independent experiments,  
384 100-200 randomly chosen bacteria from one grid were counted and for each bacterium it was  
385 determined if it was cytosolic or resided in a phago-lysosome.

#### 386 *DAMP assay for measuring lysosomal acidification*

387 Luminal acidification in lysosomes was measured via the probe, DAMP [3-(2,4-dinitroanilino)-  
388 3'-amino-N-methyldipropylamine], incubated at 30 µM for 30 min to allow accumulation in  
389 acidic compartments. DAMP was quantified by immuno-gold staining using anti-DNP.

#### 390 *Mouse infections*

391 *IL1r1<sup>-/-</sup>* mice were purchased from Jackson Laboratories (JAX 3018) and backcrossed to  
392 C57BL/6 control mice from Taconic Farms (Hudson, NY) for 11 generations. Male and female  
393 mice, 8-12 weeks of age were infected via the aerosol route with *Mtb* H37Rv (100-200  
394 CFU/mouse) as previously described (Bohrer et al., 2018) and sacrificed 27 days later. In short,  
395 mice were infected using a whole-body inhalation system (Glas-Col; Terre Haute, IN) exposing  
396 the mice to aerosolized *Mtb*. Lungs were perfusion-fixed in 4% paraformaldehyde and 0.4%  
397 glutaraldehyde overnight. After fixation, tissues were transferred to storage buffer containing  
398 0.5 % paraformaldehyde. All animals were maintained in an Association for Assessment and



399 Accreditation of Laboratory Animal Care (AALAC)-accredited BSL2 or BSL3 facilities at the  
400 National Institutes of Health (NIH) and experiments performed in compliance with an animal  
401 study proposal approved by the National Institute of Immunology Allergy and Infectious  
402 Diseases Animal Care and Use Committee.

#### 403 *SCID Mice*

404 Severe combined immunodeficiency (SCID) mice were purchased from Charles River and  
405 were aerosol infected with *M. tuberculosis* H37Rv for 21 days, when mice were sacrificed and  
406 lungs fixed by perfusion fixation as described below.

#### 407 *BALB/c, B6 mice*

408 Pathogen-free male BALB/c mice, 6-8 weeks old, were anaesthetized with sevoflurane  
409 vapours (Abbott Laboratories, Abbott Park, IL, USA) and 100 µl of PBS with  $2.5 \times 10^5$  viable  
410 H37Rv bacilli or either Beijing clinical isolates were inoculated intra-tracheally using a stainless  
411 steel cannula. Groups of 15 animals were then maintained in cages fitted with microisolators  
412 in a BSL-3 biosecurity level facility. Following infection, three mice were euthanized by  
413 exsanguination under anesthesia with pentobarbital at days 2, 7, 21, 45 and 120 of infection.  
414 Lung tissues were fixed by perfusion fixation as described below.

#### 415 *Zebrafish*

416 Zebrafish embryos and adult zebrafish (*Danio rerio*) were microinjected with *M. marinum* strain  
417 E11 as described by (Weerdenburg et al., 2012) at 30 °C. In short, zebrafish embryos were  
418 infected 28h post infection with 100 CFU *M. marinum* wild type through micro-injection in the  
419 caudal vein. Adult zebrafish were anaesthetized in 0.02% MS-222 (Sigma) and injected intra-  
420 peritoneally with  $2 \times 10^4$  *M. marinum* Tn::ESX-5. The embryos were incubated for 6 or 9 days  
421 and fixed as described below. For classification of the subcellular localization, 3 embryos of 9  
422 days incubation were used. Three adult fish were infected with E11 or E11 ESX5 mutant  
423 (Weerdenburg et al., 2012) and sacrificed at day 11 when the spleen was dissected out and  
424 fixed as described below.

425 *Armadillo*

426 Male Armadillos were intradermally inoculated in the abdomen with either  $1 \times 10^7$  live or  
427 irradiated *M. leprae* (0.1 ml). After, 3, 11 and 21 days post-inoculation, 6 mm punch biopsies  
428 were taken from the boarder of the depigmented area at the inoculation sites and fixed for 2  
429 hours as described below. For classification of the subcellular localization, 1-2 punches were  
430 used from day 3 and day 21. As no lysosomal markers suited for immuno-TEM analysis were  
431 known, anti-Cell Wall Protein (CWP) was used to immuno-label the leprosy bacteria.

432 *Human samples*

433 Leprosy skin biopsies were taken at the boarder of the depigmented lesions with written  
434 consent from 4 different lepromatous leprosy patients. Materials were directly incubated in EM  
435 grade fixatives and transported to the EM lab in fixatives.

436 *Fixation of tissues*

437 All tissues were fixed in a combination of 4% paraformaldehyde and 0.4% glutaraldehyde in  
438 0.2M PHEM (with 240mM PIPES, 100mM HEPES, 8mM MgCl<sub>2</sub> and 40mM EGTA) buffer.  
439 Fixation for at least 2 hours in fixative containing glutaraldehyde is essential to kill  
440 mycobacteria. After fixation, tissues were transferred to storage buffer containing 0.5 %  
441 paraformaldehyde in 0.2M PHEM buffer.

442 *Embedding and sectioning*

443 After fixation, tissues were washed in phosphate buffered saline (PBS), to remove fixatives.  
444 The required structures were dissected out using a razor blade and cut into 1-3 mm<sup>2</sup> sized  
445 blocks. Lung tissue was embedded in increasing percentages gelatin (2%, 5% and 12% in  
446 0.1M phosphate buffer) and incubated at 37 °C. After the removal from liquid gelatin, blocks  
447 were incubated overnight in 2.3M sucrose at 4 °C. Then blocks were snap frozen and stored  
448 in liquid nitrogen till sectioned. After trimming at -100 °C, semi thin sectioning was performed  
449 for analysis with fluorescence microscopy or ultra-thin sectioning at -120 °C was performed

450 using a diamond Diatome cryo-immuno knife on a Leica Ultracut UC6. Sections are picked up  
451 with a loop filled with a 1:1 mixture of 2,3 M sucrose and 1% tylose (Methylcellulose, G1095) in  
452 milliQ water and placed on a copper, formvar coated grid or glass slides. Grids with sections  
453 were stored at 4 °C till immuno-labeled. Fluorescence Microscopy was used to search the  
454 region of infection as described in van Leeuwen et al., 2018 and van der Wel et al., 2005. In  
455 short, semi-thin sections (200-300nm) of the whole sample were labelled with Hoechst 33342  
456 (Thermo Fisher) to indicate the nuclei of the tissue and anti-Cell Wall protein labelling was  
457 used to indicate mycobacteria.

#### 458 *Immuno-gold labelling*

459 Grids with cryo-sections were incubated on 2% gelatin in 0.1M phosphate buffer plates at 37  
460 °C for 30 min. Thereafter, grids were washed with PBS/0.02M glycine, blocked with 1% BSA  
461 and incubated for 45 minutes with primary antibody. Various antibodies were used on different  
462 tissues: for human skin and sputum: Cathapsin-B (Zymed, clone 1C11), Lysosome Associated  
463 Membrane Protein 1 and 2 (LAMP1 and LAMP2) (Pharmingen, H4A3 and H4B3), Cluster of  
464 Differentiation CD63 (clone 435 Sanquin). For Zebrafish anti-actin (Sigma AC-15), and tested  
465 but without specific labeling: anti-LAMP (Pharmingen, H4A3 and H4B3, Abcam ab67283), anti  
466 CD63 (clone 435 Sanquin). For *M. leprae*, anti Cell Wall Protein (C188, a kind gift from John  
467 Spencer and Patrick Brennan Colorado State University). DAMP (N-(3-((2,4-Dinitrophenyl)  
468 Amino)propyl)-N-(3-Aminopropyl) Methylamine, Dihydrochloride) detection was performed  
469 using anti dinitrophenol (DNP) (Polyclonal Anti-DNP, Oxford Biomedical Research). All  
470 antibodies were diluted in 1% BSA in PBS. After washing in PBS/0.02M glycine and blocking  
471 in 0.1% BSA in PBS/0.02M glycine, grids are incubated on bridging antibody when primary  
472 antibody was monoclonal or goat origin. After washing and blocking, grids are incubated on  
473 protein A gold diluted in 1% BSA in PBS. To remove unbound gold, grids were washed with  
474 PBS and fixed using 1% glutaraldehyde in PBS, then washed with MiliQ and contrasted with  
475 uranyl acetate and methylcellulose at pH 4.

#### 476 *Immuno-fluorescence labelling*

477 Semi-thin sections (200-300nm) placed on glass were washed with PBS/0.02M Glycine and  
478 incubated with primary antibody anti Cell Wall Protein for 45 minutes. Then, the sections were  
479 washed with PBS and incubated with secondary antibody goat-anti-rabbit Alexa 488 (Mol.  
480 Probes, A32731) for 20 minutes and Hoechst 33342 for 5 minutes (Thermo Fisher, H3570).  
481 After washing with PBS, samples were mounted with Vectashield. The sections were imaged  
482 using a Leica DM6 wide-field microscope and images were analyzed using FIJI.

#### 483 *Statistical analysis and subcellular classification*

484 Statistical analysis was performed using Graphpad-Prism 8.0 software. In the legends, the  
485 average is given with the standard deviation and n indicate the number of bacteria localized in  
486 a specific subcellular compartment. Significance was determined by using unpaired T test and  
487 defined in the graphs as  $P < 0.05 = *$ ,  $P < 0.01 = **$  and  $P < 0.001 = ***$ . The number of biological  
488 samples, and bacteria counted in mice are listed in Supplemental Table 1.

489 Classification of the subcellular localization of bacteria was performed blindfolded and by 2  
490 individual counters to establish inter-counter reproducibility. Bacteria are classified as cytosolic  
491 when 1/3 or less of the bacteria or bacterial cluster is surrounded by a visible membrane and  
492 2 or less gold particles detecting lysosomal markers are present. Bacteria are classified as  
493 phagosomal when 1/3 or more of the bacteria or bacterial cluster is surrounded by a visible  
494 membrane and 2 or less gold particles detecting lysosomal markers is present and phago-  
495 lysosomal when 1/3 or more of the bacteria or bacterial cluster is surrounded by a visible  
496 membrane and 3 or more gold particles detecting lysosomal markers are present.

497

#### 498 *Ethics statement*

499 SCID mouse infections were performed in agreement with European and French guidelines  
500 (Directive 86/609/CEE and Decree 87–848 of 19 October 1987). The experiments received  
501 the approval by the Institut Pasteur Safety Committee (Protocol 11.245) and the ethical

502 approval by local ethical committees “Comité National de Réflexion Ethique sur  
503 l’Expérimentation Animale N° 59 (CNREEA)”.

504 Adult zebrafish of the local Free University of Amsterdam (VU) line were handled in compliance  
505 with the local animal welfare regulations and approved by the local animal welfare commission  
506 (IvD) of the VU/Amsterdam University Medical Centre. For zebrafish embryo experiments that  
507 are performed within the grace period (i.e. first 6 days) no special permission is allowed, since  
508 these experiments fall under animal experimentation law according to the EU Animal  
509 Protection Directive 2010/63/EU.

510 BALB/c mouse infections were approved by the Institutional Ethics Committee of Animals  
511 Experimentation of the National Institute of Medical Sciences and Nutrition Salvador Zubirán  
512 in accordance with the guidelines of the Mexican national regulations on Animal Care and  
513 Experimentation NOM 062-ZOO-1999

514 Experiments using armadillos were performed in accordance with USPHS Policy on the  
515 Humane Care and Use of Laboratory Animals and the USDA Animal and Plant Health  
516 Inspection Service. The Institutional Animal Care and Use Committee reviewed and approved  
517 the protocol.

## 518 **Acknowledgements**

519 We would like to thank Wikky Tigchelaar – Gutter, Pekka Kujala, Hans Janssen for EM  
520 analysis, Gidado Mustapha, Nigeria for leprosy skin biopsies and Peter Peters for facilitating  
521 EM analysis and starting the project. We are also grateful to Wafa Frigui and Alexandre Pawlik  
522 for help with infection experiments. We would like to thank Branch Moody for critically reading  
523 the manuscript and the helpful comments. RB acknowledges support by ANR-10-LABX-62-  
524 IBEID. SvdN and NvdW acknowledge NIH grant no AI116604 and Netherlands Leprosy Relief.  
525 The NIH, NIAID funded the armadillo studies through the Interagency Agreement No.  
526 AAI15006 with the Health Resources and Services Administration, Healthcare Systems  
527 Bureau, National Hansen’s Disease Program.

528

529 **Author contributions**

530 SvdN, ER, KDMB and NvdW wrote the manuscript, SvdN, MvZ, KdP, AG, SR, SM, DH  
531 performed EM analysis AvdS, WB, RB, RHP, MP performed infection experiments, KDMB  
532 performed and designed experiments and NvdW conceived and designed experiments.

533 **Declaration of interests**

534 The authors declare no competing interests.

535 **Main Figure titles + Legends**

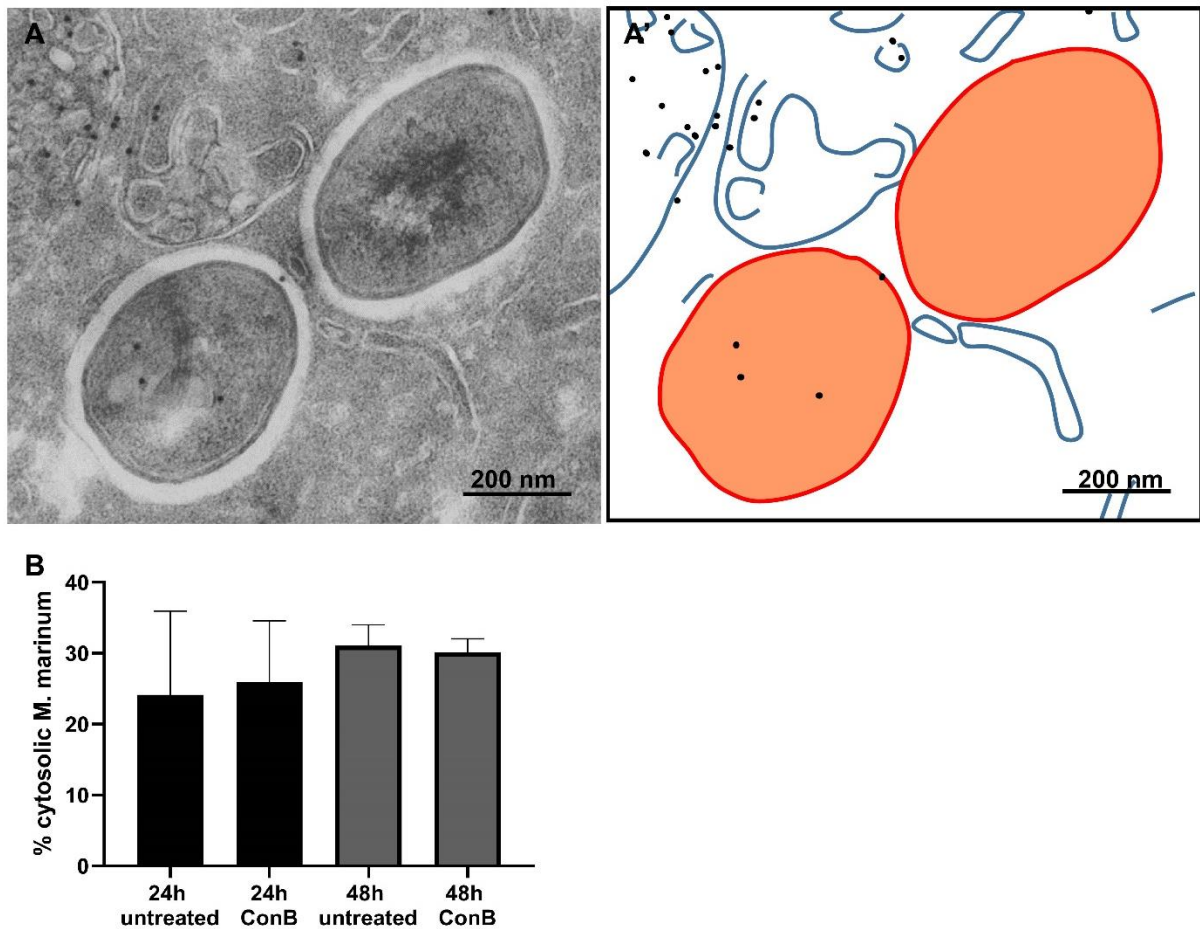

536

537 **Legend Figure 1. The pH of the phago-lysosome does not affect cytosolic translocation**

538 **of *M. marinum*.** A) Electron micrograph of a THP-1 cell infected with *M. marinum* for 24 hour

539 in the presence of ConB showing *M. marinum* in the cytosol without membrane and CD63

540 labeling. CD63 immunolabelling indicated by 10 nm gold particles is present on the

541 multivesicular lysosome in the left top corner. A') schematic representation of micrograph in A

542 with in blue lines host membranes, black dots CD63 labelling indicated by 10 nm gold particles,

543 orange bacteria and bar represents 200 nm. B) Quantification of the percentage of *M. marinum*

544 in the cytosol 24 and 48 hours after infection using immuno-gold labelling for CD63 (see also

545 supplemental Figure 2A). Cells were treated with ConB to raise lysosomal pH, which did not

546 affect the percentage of cytosolic *M. marinum*. Error bars represent the standard deviation of

547 3 experiments.



548 **Figure 2**

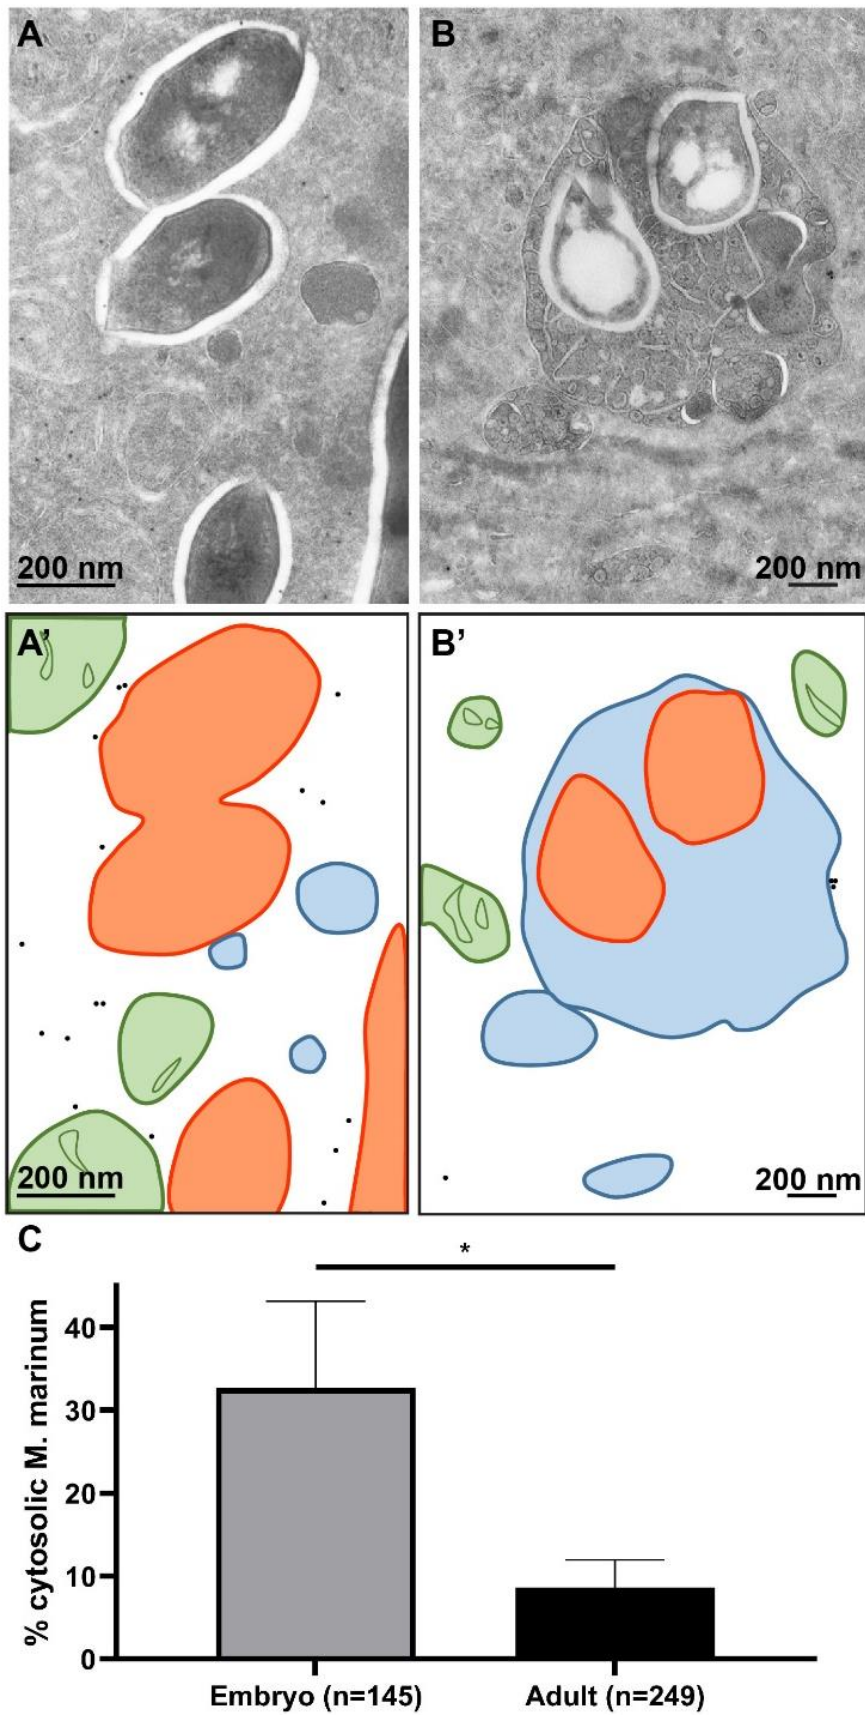

549

550 **Legend Figure 2: Cytosolic localization of *M. marinum* in zebrafish is abundant when**  
551 **the adaptive immune system is yet developed.** Embryo and adult zebrafish infected with *M.*  
552 *marinum* were analysed using TEM. A) Cytosolic *M. marinum* in zebrafish embryo tissue. B)  
553 Phagosomal *M. marinum*  $\Delta$ ESX5 in adult zebrafish tissue. A') and B') Schematic  
554 representation of A and B, with black dots indicating actin immuno-gold labelling, orange lines  
555 *M. marinum* and blue lines phagosomal and host membranes, green lines mitochondria. C)  
556 Quantification of the percentage of cytosolic *M. marinum* at embryo day 9 and in spleen adult  
557 zebrafish at day 11 (see also Supplemental Figure 2B). Error bars indicate standard deviation  
558 between 3 different zebrafish embryos and 3 adult fish, n represents the total number of  
559 bacteria counted.

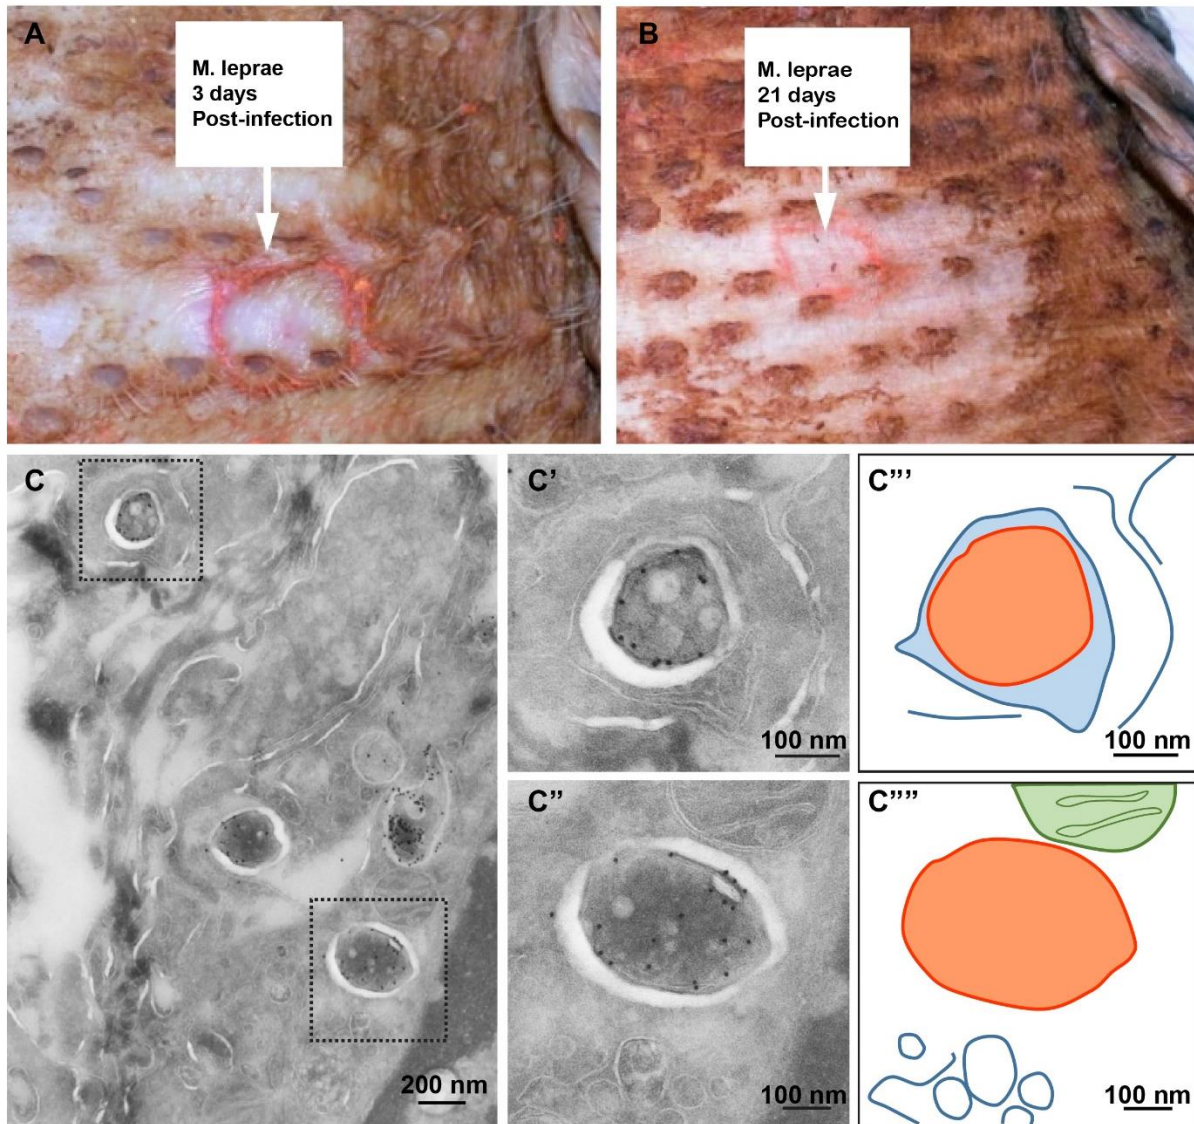

560

561 **Legend Figure 3: Restrained cytosolic *M. leprae* localization in armadillo skin biopsies.**

562 Live *M. leprae* injected in the skin of the armadillo at the red circle indicated by the white arrow

563 text box. The skin was observed at A) 3 days after infection and B) 21 days after infection. At

564 infection sites loss of pigmentation was detected. C) TEM image of infected armadillo skin

565 biopsy 3 days after infection with viable *M. leprae*. Immuno-gold labelling using  $\alpha$ CWP to

566 indicate *M. leprae*. C') enlargement of boxed area in C, *M. leprae* enclosed by host membranes

567 and thus phagosomal. C''), enlargement of lower boxed area in C, *M. leprae* was not enclosed

568 by host membranes and thus cytosolic. C'''), C'''')) Schematic representation of C' and C'' with

569 in orange *M. leprae* and the blue lines indicate host membranes and green mitochondrial

570 membranes. Total number of bacteria detected at day 3 is 47 and at day 21 is 45.

571 **Figure 4.**

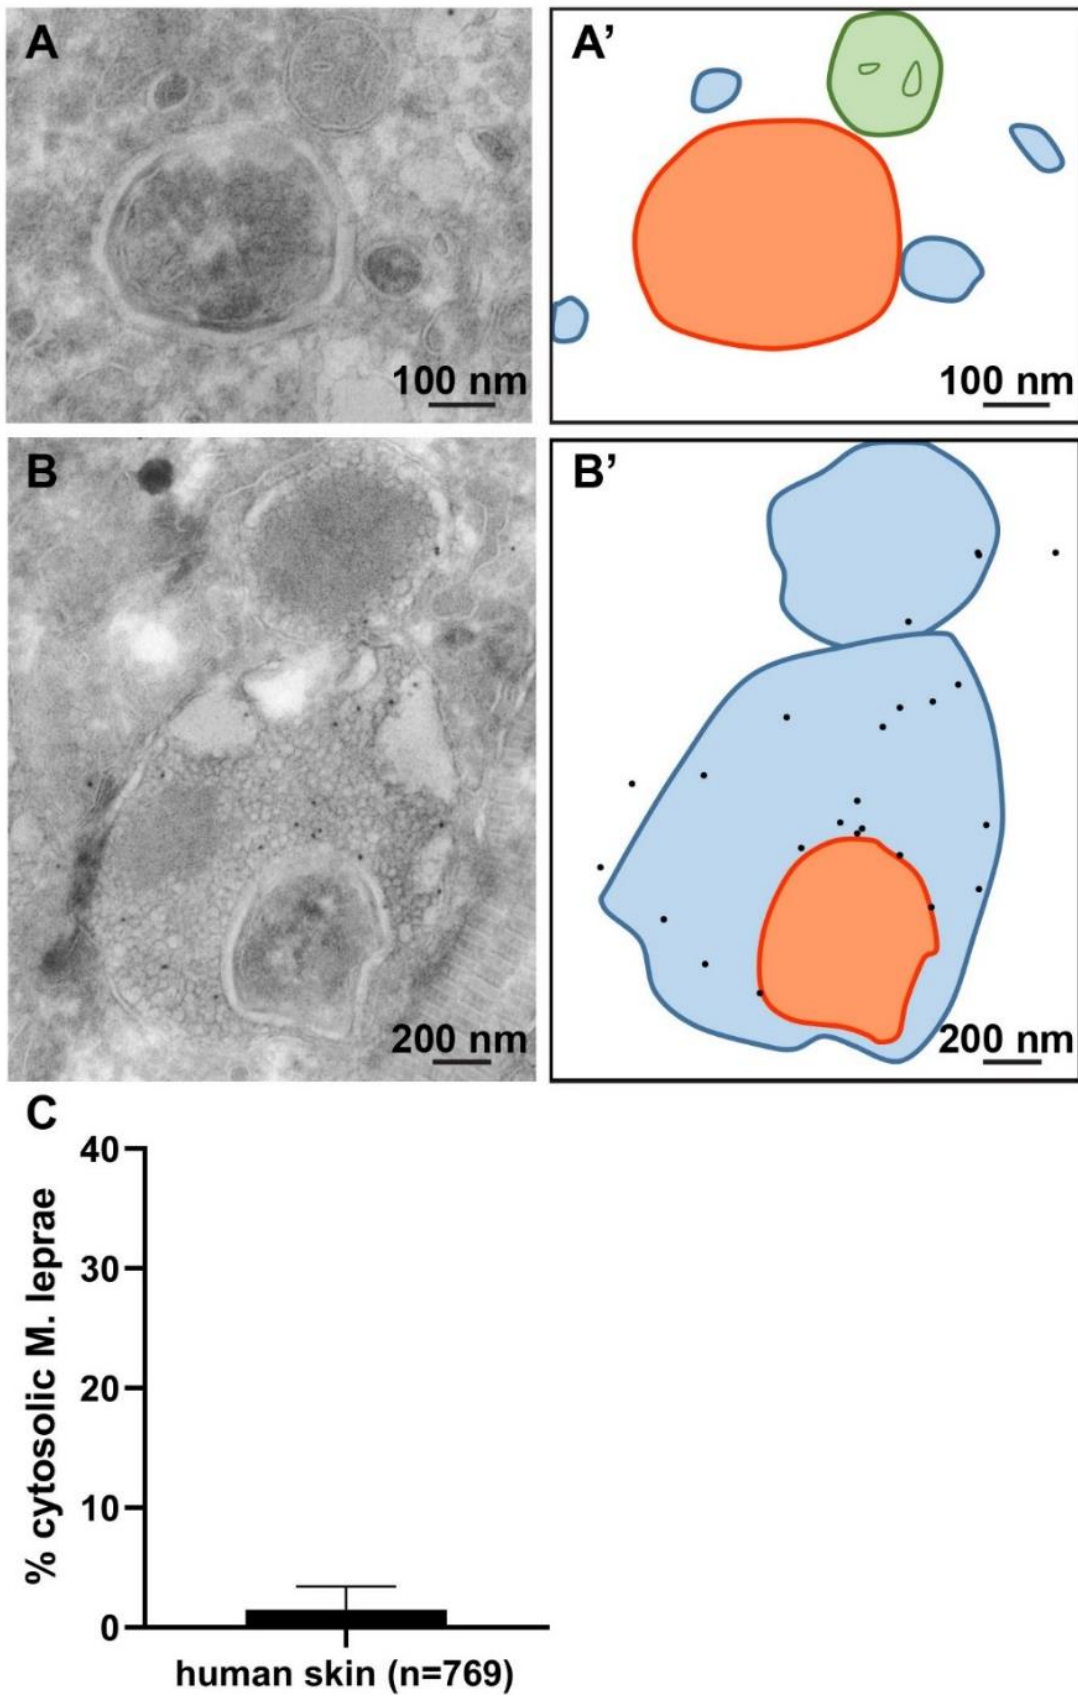

572

573



574 **Legend Figure 4. Restrained cytosolic localization of *M. leprae* in human skin biopsies.**

575 Leprosy patient skin biopsies were analyzed using TEM. Immuno-gold labelling for Cathepsin-  
576 D was used to label lysosomes and phagolysosomes. A) TEM image of patient skin biopsy  
577 with cytosolic *M. leprae*, the mycobacteria was not enclosed with host membranes. A')  
578 Schematic representation of A, orange indicate *M. leprae*, blue lines indicate host membranes,  
579 and green mitochondria. B) *M. leprae* present in the phagolysosome, the mycobacterium is  
580 enclosed by host membranes, immunogold labelled for lysosomal marker Cathepsin-D. B')  
581 Schematic representation of B, black dots indicate Cathepsin-D labelling, orange indicate *M.*  
582 *leprae* and the blue lines indicate phagolysosomal membranes. C) Quantification of the  
583 average percentage of *M. leprae* present in the cytosol, error bar indicates standard deviation  
584 from 4 different patients, n represents the total number of intracellular bacteria (see also  
585 Supplemental Figure 2C).

586 **Figure 5.**

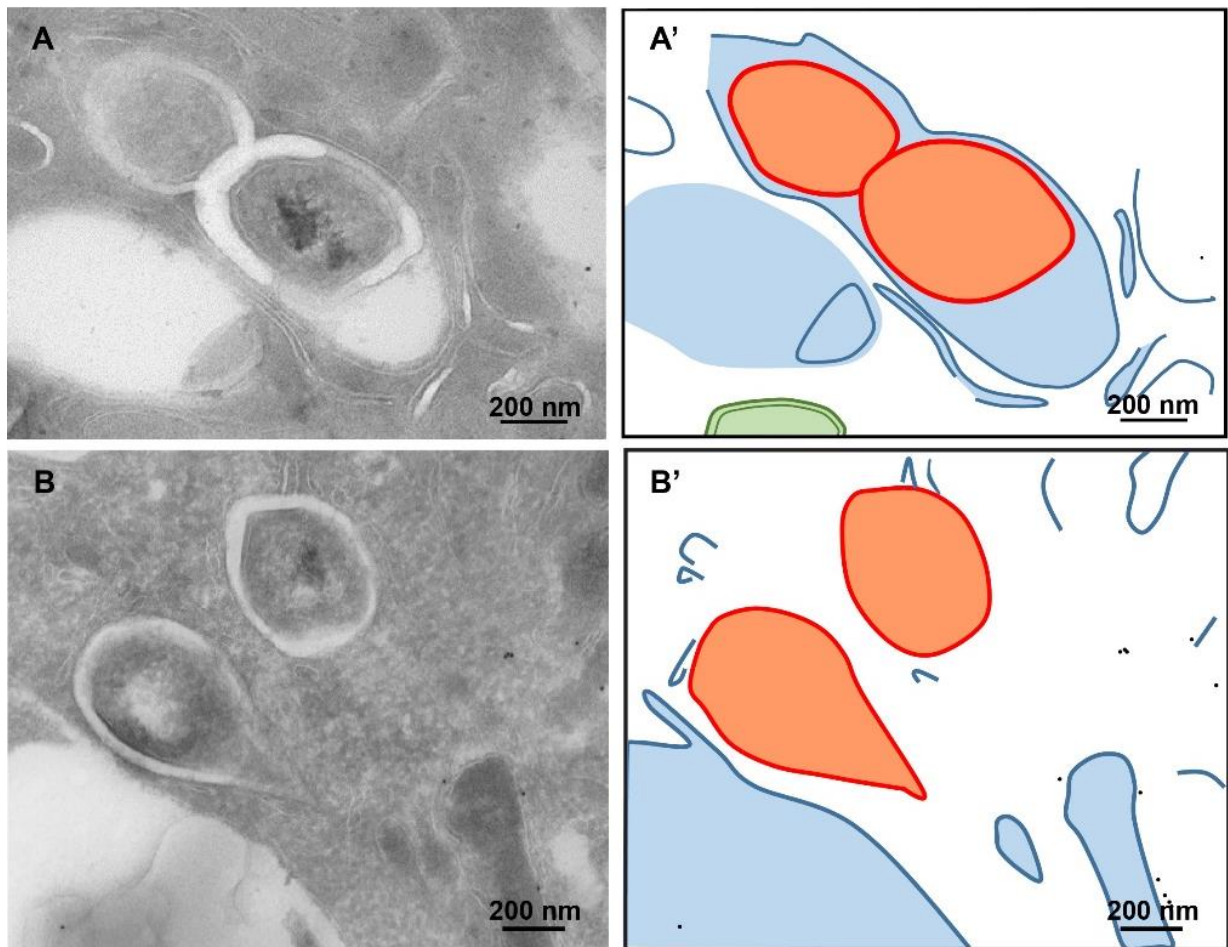

589 **Legend Figure 5. Early cytosolic localization of *Mtb* in SCID mouse lungs.** A,B) Sections  
590 of SCID mice lung tissue infected with *Mtb* H37Rv for 21 days were labelled for LAMP1 using  
591 immuno-gold labelling, to indicate lysosomes. A'B') schematic representation with in orange  
592 *Mtb*, blue lines host membranes, black dots gold particles indicating LAMP1 decorated  
593 lysosomes and green mitochondria. A) cross section of *Mtb* surrounded by cellular membranes  
594 thus phagosomal. B) *Mtb* is present in the cytosol, without cellular membranes surrounding the  
595 bacteria, scale bar indicates 200 nm. Information number of imaged bacteria and mice see  
596 Supplemental Table 1.

597 **Figure 6.**

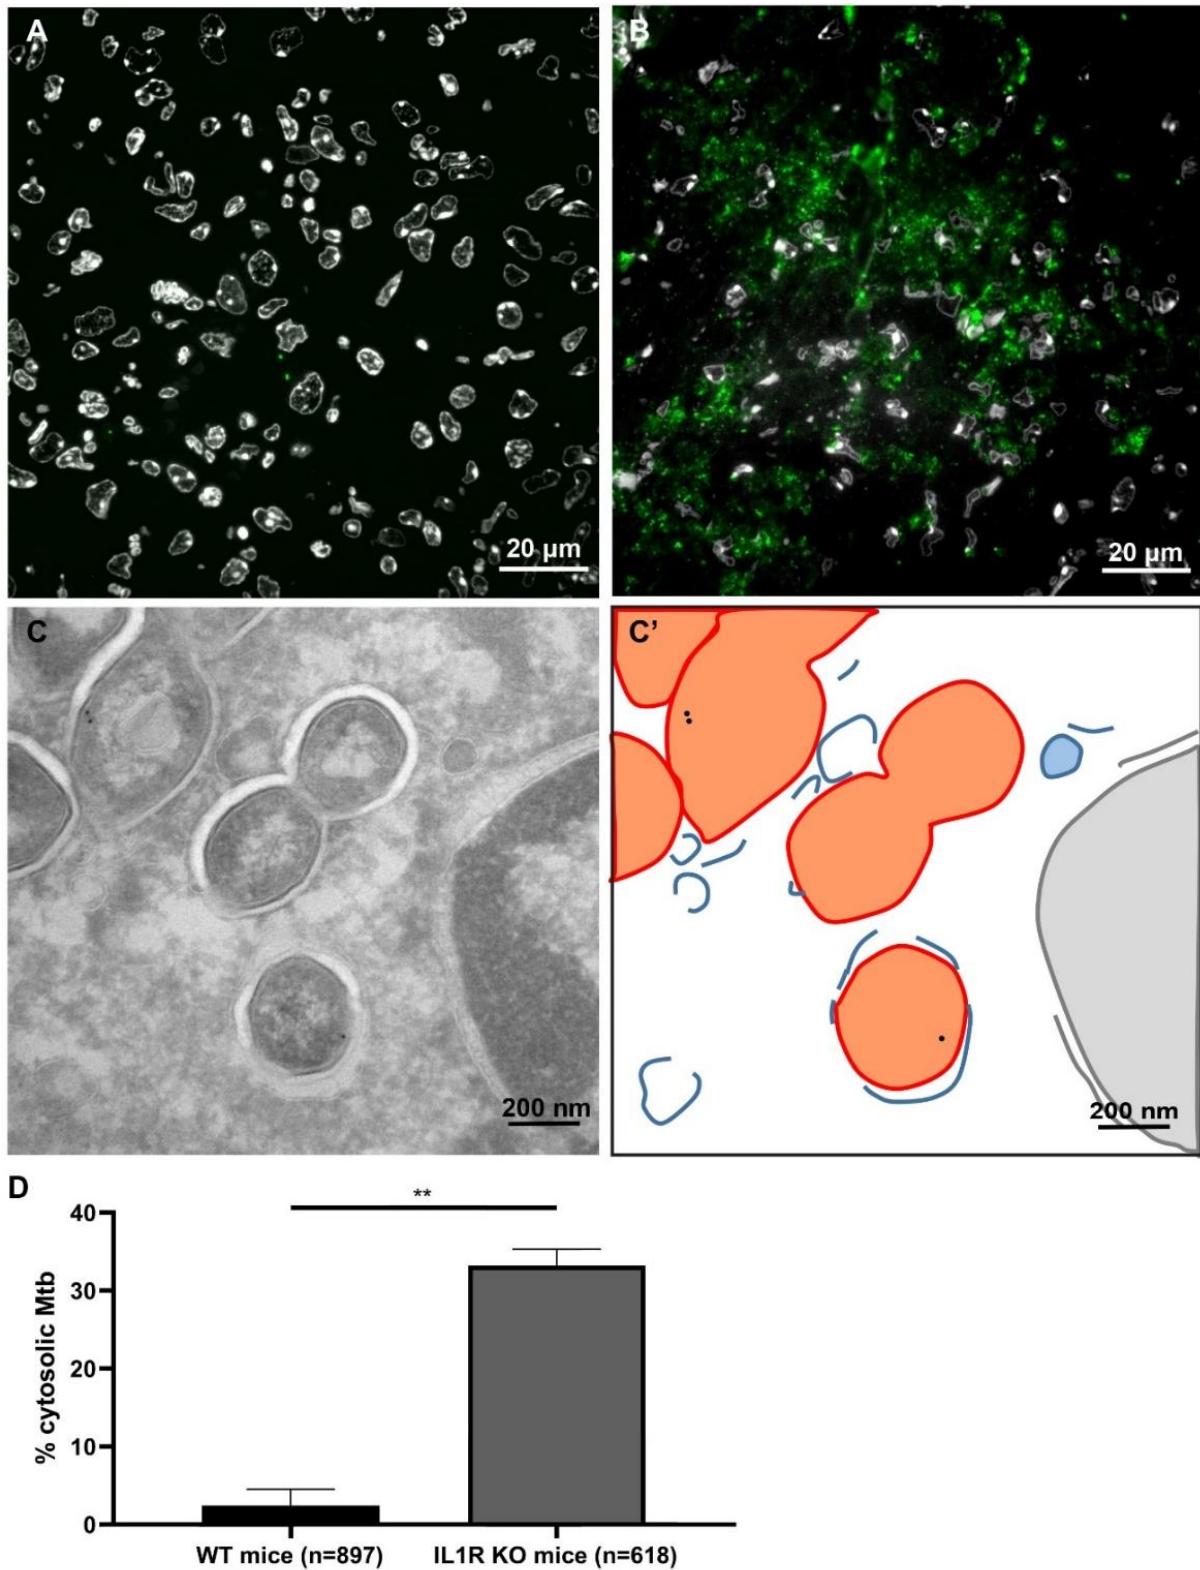

598



599 **Legend Figure 6. *Mtb* preferentially localize to the cytosol in *Il1r1*<sup>-/-</sup> mice.** Fluorescence  
600 microscopy of 200 nm sections stained with DAPI for nuclei (white) and anti-cell wall protein  
601 to detect *Mtb* (green) in granuloma in lung tissue of A) WT B6 mice and B) *Il1r1*<sup>-/-</sup> mice infected  
602 with *Mtb* for 28 days. C) Immuno-gold labelling using LAMP1 indicate lysosomal membranes  
603 in *Il1r1*<sup>-/-</sup> mice imaged using TEM. C') schematic representation of C, *Mtb* is depicted in  
604 orange, host membranes in blue and host nucleus in pink. D) Quantification of the localization  
605 of *Mtb* in B6 and *Il1r1*<sup>-/-</sup> lungs, here presenting cytosolic localization (see also Supplemental  
606 Figure 2D). Error bars indicate standard deviation based on the analysis of 897 (WT) or 618  
607 (*Il1r1*<sup>-/-</sup>) bacteria in multiple granulomas of 2 WT B6 and 2 *Il1r1*<sup>-/-</sup> mice.

608 **Supplemental items titles and legends van der Niet et al.,**

609 **Supplemental Figure 1**

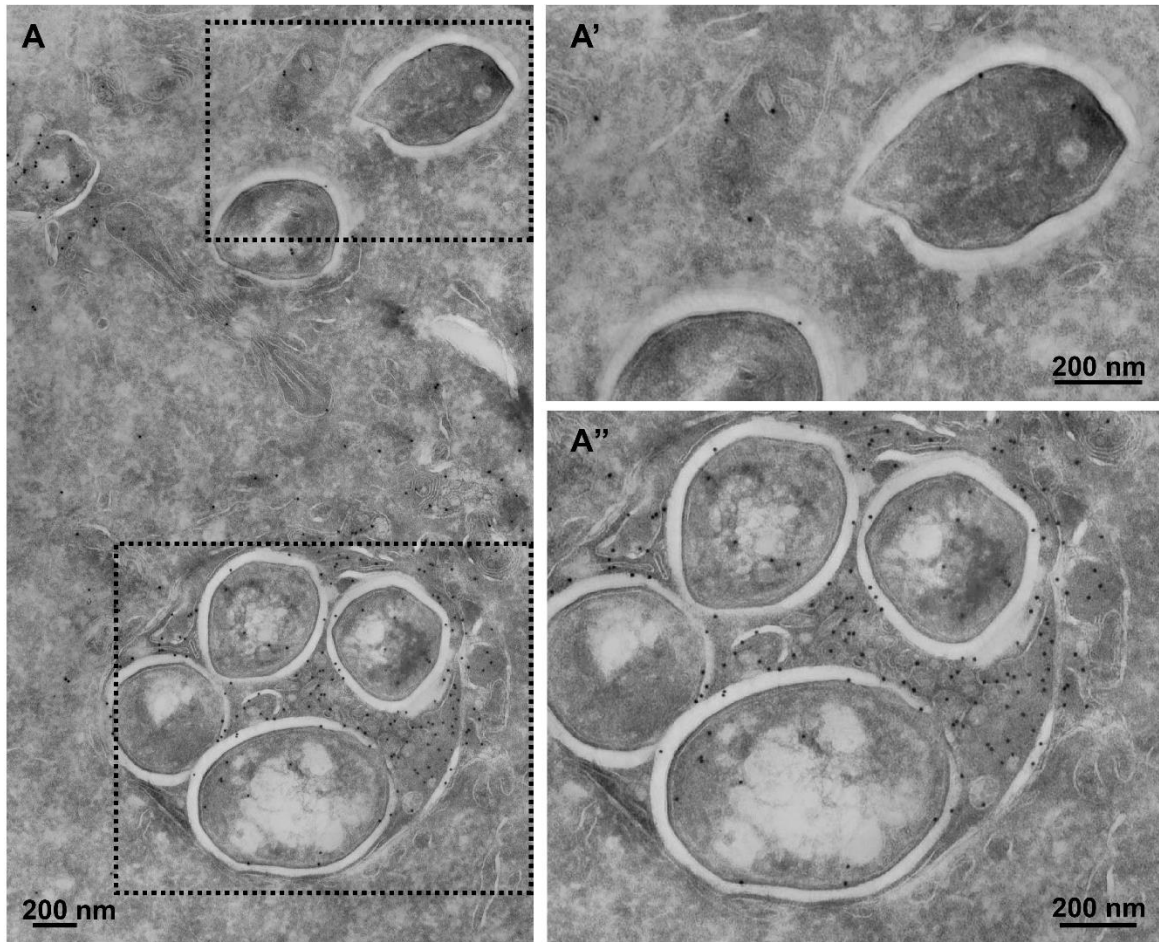

610

611 **Legend Supplemental Figure 1:**

612 The pH of the phago-lysosome does not affect cytosolic translocation of *M. marinum*.

613 A) *M. marinum* infected THP-1 cells were incubated with DAMP to identify acidic organelles.

614 Thereafter, the cells were fixed and analyzed using TEM. The acidity of the lysosome was

615 determined using immuno-gold labelling against DAMP using DNP, the higher the label density

616 the more acidic the phagosome or lysosome. A') cytosolic *M. marinum* without membranes

617 enclosing the mycobacteria. A") Lysosomal *M. marinum*, enclosed by host membrane and

618 DAMP labelled. B) Label density as measured in the number of gold particles per  $\mu\text{m}^2$  on *M.*

619 *marinum* containing phagosomes or lysosomes in *M. marinum* infected THP-1 cells, *M.*

620 *marinum* infected Con B treated THP-1 cells and uninfected untreated THP-1 cells.

621 **Supplemental Figure 2**

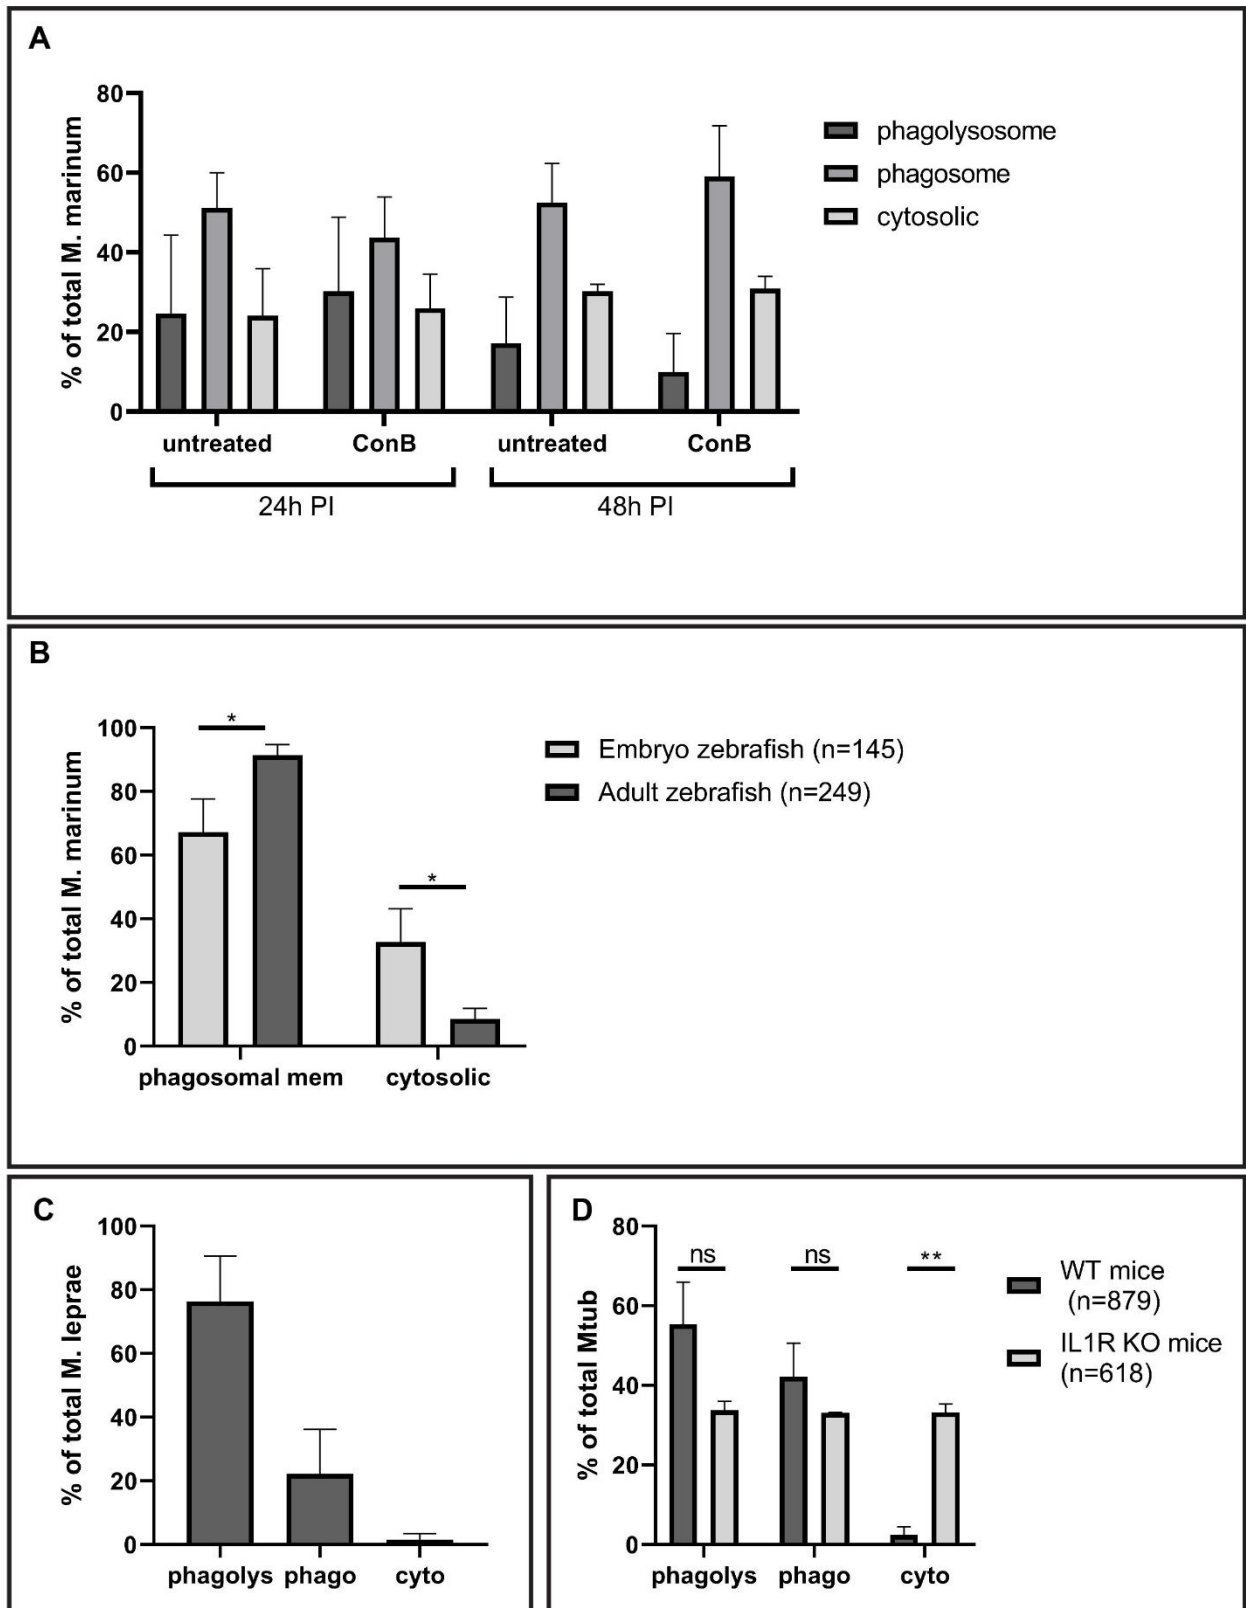

622

623 **Legend Supplemental Figure 2**

624 **Quantification of the percentage of mycobacteria in the phagosome, phagolysosome or**  
625 **cytosol using immuno-gold labelling and TEM analysis.** The bacteria are classified as  
626 phagolysosomal when a host membrane is immunogold labelled with at least 2 gold  
627 conjugated to lysosomal markers such as CD63, LAMP1 or Cathepsin D are present,  
628 phagosomal with less than 2 gold marked membrane enclosed compartment are present and  
629 cytosolic when both membrane and gold is absent.

630 A) Subcellular localization *M. marinum* in THP1 cells treated with ConB or untreated.  
631 Immunogold labelling with CD63 average of 3 experiments with 100-200 bacteria classified  
632 (Related to Figure 1B).

633 B) Subcellular localization *M. marinum* in zebrafish embryo day 9 and in spleen adult zebrafish  
634 day 11, error bars indicate standard deviation between 3 different zebrafish embryos and 3  
635 adult fish. In three embryonic zebrafish, 17, 54 and 74 bacteria were detected and in three  
636 adult zebrafish 91, 8 and 150 bacteria were detected and categorized. As no good lysosomal  
637 markers are present, a discrimination between phagolysosomal and phagosomal can not be  
638 made (Related to Figure 2C).

639 C) Subcellular localization of *M. leprae* in skin biopsies of 4 different leprosy patients, using  
640 Cathepsin-D as a lysosomal marker, error bar indicates standard deviation from 4 different  
641 patients, where respectively 165, 248, 49 and 307 individual bacteria were detected and  
642 classified for their subcellular localization (Related to Figure 4C).

643 D) Subcellular localization of *Mtb* in lung of WT B6 mice and *Il1r1*<sup>-/-</sup> mice 4 weeks infected  
644 using LAMP1 as a lysosomal marker (Related to Figure 6D). Error bars represent standard  
645 deviation based on the analysis of 897 (WT) or 618 (*Il1r1*<sup>-/-</sup>) bacteria in multiple granulomas  
646 of 2 WT B6 and 2 *Il1r1*<sup>-/-</sup> mice (Related to Figure 6).

647 **Supplemental Table 1**

| Mouse  | Mtb strain                | Day of infection | % bacteria in phago-lysosome | % bacteria in phagosome | % bacteria in cytosol | n counted bacteria | n mice |
|--------|---------------------------|------------------|------------------------------|-------------------------|-----------------------|--------------------|--------|
| BALB/c | H37Rv                     | D2               | 38                           | 62                      | 0                     | 47                 | 1      |
|        |                           | D7               | 71                           | 23                      | 6                     | 52                 | 2      |
|        |                           | D21              | 0.4                          | 98                      | 2                     | 247                | 2      |
|        |                           | D45              | 0                            | 100                     | 0                     | 5                  | 1      |
|        |                           | D120             | 0                            | 97                      | 3                     | 38                 | 2      |
|        | 1998-1500 Ancient Beijing | D21              | 0                            | 93                      | 7                     | 31                 | 1      |
|        |                           | D45              | 0                            | 100                     | 0                     | 193                | 1      |
|        |                           | D120             | 0                            | 100                     | 0                     | 35                 | 2      |
|        | 2002-0230 Beijing         | D120             | 0                            | 100                     | 0                     | 166                | 2      |
|        | SCID                      | H37Rv            | D21                          | 29                      | 54                    | 17                 | 167    |

648

649 **Legend Supplemental Table 1:**

650 Overview of the subcellular localization of various *Mtb* strains infected at different days of  
651 infection in BALB/c or SCID mice. The number of bacteria used and the number of mice in  
652 which bacteria were detected are given in the last 2 columns. Similar to Supplemental figure  
653 1, bacteria are classified as phagolysosomal, phagosomal or cytosolic based on the number  
654 of gold attached to lysosomal markers and the presence of a membrane.

655 **References**

- 656 Armstrong, J. A., & D'Arcy Hart, P. (1971). Response of cultured macrophages to  
657 mycobacterium tuberculosis, with observations on fusion of lysosomes with  
658 phagosomes. *J Exp Med*, 134(3), 713–740.
- 659 Augenstreich, J., Arbues, A., Simeone, R., Haanappel, E., Wegener, A., Sayes, F., ...  
660 Astarie-Dequeker, C. (2017). ESX-1 and phthiocerol dimycocerosates of Mycobacterium  
661 tuberculosis act in concert to cause phagosomal rupture and host cell apoptosis.  
662 *Cellular Microbiology*, 19(7), 1–19. <https://doi.org/10.1111/cmi.12726>
- 663 Bohrer, A. C., Tocheny, C., Assmann, M., Ganusov, V. V., & Mayer-Barber, K. D. (2018).  
664 Cutting Edge: IL-1R1 Mediates Host Resistance to Mycobacterium tuberculosis by  
665 Trans -Protection of Infected Cells . *The Journal of Immunology*, 201(6), 1645–1650.  
666 <https://doi.org/10.4049/jimmunol.1800438>
- 667 Buter, J., Cheng, T.-Y., Ghanem, M., Grootemaat, A. E., Raman, S., Feng, X., ... Moody, D.  
668 B. (2019). Mycobacterium tuberculosis releases an antacid that remodels phagosomes.  
669 *Nature Chemical Biology*, 15(9), 889–899. <https://doi.org/10.1038/s41589-019-0336-0>
- 670 Chen, Q., Sun, L., & Chen, Z. J. (2016). Regulation and function of the cGAS-STING  
671 pathway of cytosolic DNA sensing. *Nature Immunology*, 17(10), 1142–1149.  
672 <https://doi.org/10.1038/ni.3558>
- 673 Clemens, D. L., Lee, B. Y., & Horwitz, M. A. (2000). Mycobacterium tuberculosis and  
674 Legionella pneumophila phagosomes exhibit arrested maturation despite acquisition of  
675 Rab7. *Infection and Immunity*, 68(9), 5154–5166. [https://doi.org/10.1128/IAI.68.9.5154-](https://doi.org/10.1128/IAI.68.9.5154-5166.2000)  
676 [5166.2000](https://doi.org/10.1128/IAI.68.9.5154-5166.2000)
- 677 Cohen, S. B., Gern, B. H., Delahaye, J. L., Adams, K. N., Plumlee, C. R., Winkler, J. K., ...  
678 Urdahl, K. B. (2018). Alveolar Macrophages Provide an Early Mycobacterium  
679 tuberculosis Niche and Initiate Dissemination. *Cell Host and Microbe*, 24(3), 439-



- 680 446.e4. <https://doi.org/10.1016/j.chom.2018.08.001>
- 681 Collins, A. C., Cai, H., Li, T., Franco, L. H., Li, X. D., Nair, V. R., ... Shiloh, M. U. (2015).  
682 Cyclic GMP-AMP Synthase Is an Innate Immune DNA Sensor for Mycobacterium  
683 tuberculosis. *Cell Host and Microbe*, 17(6), 820–828.  
684 <https://doi.org/10.1016/j.chom.2015.05.005>
- 685 Crowle, A. J., Dahl, R., Ross, E., & May, M. H. (1991). Evidence that vesicles containing  
686 living, virulent Mycobacterium tuberculosis or Mycobacterium avium in cultured human  
687 macrophages are not acidic. *Infection and Immunity*, 59(5), 1823–1831.
- 688 Doitsh, G., & Greene, W. C. (2016). Dissecting how CD4 T cells are lost during HIV infection.  
689 *Cell Host and Microbe*, 19(3), 280–291. <https://doi.org/10.1016/j.physbeh.2017.03.040>
- 690 Dupuis, S., Döffinger, R., Picard, C., Fieschi, C., Altare, F., Jouanguy, E., ... Casanova, J. L.  
691 (2000). Human interferon- $\gamma$ -mediated immunity is a genetically controlled continuous  
692 trait that determines the outcome of mycobacterial invasion. *Immunological Reviews*,  
693 178, 129–137.
- 694 Flynn, J. A. L., Chan, J., Triebold, K. J., Dalton, D. K., Stewart, T. A., & Bloom, B. R. (1993).  
695 An essential role for interferon  $\gamma$  in resistance to mycobacterium tuberculosis infection.  
696 *Journal of Experimental Medicine*, 178(6), 2249–2254.  
697 <https://doi.org/10.1084/jem.178.6.2249>
- 698 Gröschel, M. I., Sayes, F., Shin, S. J., Frigui, W., Pawlik, A., Orgeur, M., ... Brosch, R.  
699 (2017). Recombinant BCG Expressing ESX-1 of Mycobacterium marinum Combines  
700 Low Virulence with Cytosolic Immune Signaling and Improved TB Protection. *Cell*  
701 *Reports*, 18(11), 2752–2765. <https://doi.org/10.1016/j.celrep.2017.02.057>
- 702 Guirado, E., Mbawuike, U., Keiser, T. L., Arcos, J., Azad, A. K., Wang, S. H., & Schlesinger,  
703 L. S. (2015). Characterization of host and microbial determinants in individuals with  
704 latent tuberculosis infection using a human granuloma model. *MBio*, 6(1), 1–13.

- 705 <https://doi.org/10.1128/mBio.02537-14>
- 706 Houben, D., Demangel, C., van Ingen, J., Perez, J., Baldeón, L., Abdallah, A. M., ... Peters,  
707 P. J. (2012). ESX-1-mediated translocation to the cytosol controls virulence of  
708 mycobacteria. *Cellular Microbiology*, 14(8), 1287–1298. <https://doi.org/10.1111/j.1462->  
709 5822.2012.01799.x
- 710 Huang, L., Nazarova, E. V., Tan, S., Liu, Y., & Russell, D. G. (2018). Growth of  
711 Mycobacterium tuberculosis in vivo segregates with host macrophage metabolism and  
712 ontogeny. *Journal of Experimental Medicine*, 215(4), 1135–1152.  
713 <https://doi.org/10.1084/jem.20172020>
- 714 Ji, D. X., Yamashiro, L. H., Chen, K. J., Mukaida, N., Kramnik, I., Darwin, K. H., & Vance, R.  
715 E. (2019). Type I interferon-driven susceptibility to Mycobacterium tuberculosis is  
716 mediated by interleukin-1 receptor antagonist IL-1Ra. *Nature Microbiology*, 4(12),  
717 2128–2135. <https://doi.org/10.1016/j.physbeh.2017.03.040>
- 718 Juffermans, N. P., Florquin, S., Camoglio, L., Verbon, A., Kolk, A. H., Speelman, P., &  
719 Deventer, S. J. H. Van. (2000). Interleukin-1 Signaling Is Essential for Host Defense  
720 during Murine Pulmonary Tuberculosis. *The Journal of Infectious Diseases*, 902–908.
- 721 Kupz, A., Zedler, U., Stäber, M., Perdomo, C., Dorhoi, A., Brosch, R., & Kaufmann, S. H. E.  
722 (2016). ESAT-6 – dependent cytosolic pattern recognition drives noncognate  
723 tuberculosis control in vivo. *The Journal of Clinical Investigation*, 126(6), 2109–2122.  
724 <https://doi.org/10.1172/JCI84978DS1>
- 725 Langenau, D. M., Ferrando, A. A., Traver, D., Kutok, J. L., Hezel, J. D., Kanki, J. P., ...  
726 Trede, N. S. (2004). In vivo tracking of T cell development , ablation , and engraftment  
727 in transgenic zebrafish. *PNAS*, 101(19), 7369–7374.
- 728 Leake, E. S., Myrvik, Q. N., Wright, M. J., & Carolina, N. (1984). Phagosomal Membranes of  
729 Mycobacterium bovis BCG-Immune Alveolar Macrophages Are Resistant to Disruption

- 730 by *Mycobacterium tuberculosis* H37Rv. *Infection and Immunity*, 45(2), 443–446.
- 731 Lerner, T. R., Borel, S., & Gutierrez, M. G. (2015). The innate immune response in human  
732 tuberculosis. *Cellular Microbiology*, 17(9), 1277–1285. <https://doi.org/10.1111/cmi.12480>
- 733 Lerner, T. R., Carvalho-Wodarz, C. D. S., Repnik, U., Russell, M. R. G., Borel, S., Dledrich,  
734 C. R., ... Gutierrez, M. G. (2016). Lymphatic endothelial cells are a replicative niche for  
735 *Mycobacterium tuberculosis*. *Journal of Clinical Investigation*, 126(3), 1093–1108.  
736 <https://doi.org/10.1172/JCI83379>
- 737 Lerner, T. R., Queval, C. J., Fearn, A., Repnik, U., Griffiths, G., & Gutierrez, M. G. (2018).  
738 Phthiocerol dimycocerosates promote access to the cytosol and intracellular burden of  
739 *Mycobacterium tuberculosis* in lymphatic endothelial cells. *BMC Biology*, 1–13.  
740 <https://doi.org/10.1186/s12915-017-0471-6>
- 741 Lerner, T. R., Queval, C. J., Lai, R. P., Russell, M., Fearn, A., Greenwood, D. J., ...  
742 Gutierrez, M. G. (2020). *Mycobacterium tuberculosis* cords in the cytosol of live  
743 lymphatic endothelial cells to evade host immune surveillance. *JCI Insight*.
- 744 Majlessi, L., & Brosch, R. (2015). *Mycobacterium tuberculosis* Meets the Cytosol: The Role  
745 of cGAS in Anti-mycobacterial Immunity. *Cell Host and Microbe*, 17(6), 733–735.  
746 <https://doi.org/10.1016/j.chom.2015.05.017>
- 747 Marino, S., Pawar, S., Fuller, C. L., Reinhart, T. A., Flynn, J. L., & Kirschner, D. E. (2004).  
748 Dendritic Cell Trafficking and Antigen Presentation in the Human Immune Response to  
749 *Mycobacterium tuberculosis*. *The Journal of Immunology*, 173(1), 494–506.  
750 <https://doi.org/10.4049/jimmunol.173.1.494>
- 751 Mayer-Barber, K. D., Andrade, B. B., Barber, D. L., Hieny, S., Feng, C. G., Caspar, P., ...  
752 Sher, A. (2011). Innate and adaptive interferons suppress IL-1 $\alpha$  and IL-1 $\beta$  production by  
753 distinct pulmonary myeloid subsets during *Mycobacterium tuberculosis* infection.  
754 *Immunity*, 36(6), 1023–1034. <https://doi.org/10.1038/jid.2014.371>

- 755 Mayer-Barber, K. D., Andrade, B. B., Oland, S. D., Amaral, E. P., Barber, D. L., Gonzales, J.,  
756 ... Sher, A. (2014). Host-directed therapy of tuberculosis based on interleukin-1 and  
757 type I interferon crosstalk. *Nature*, 118(24), 6072–6078.  
758 <https://doi.org/10.1002/cncr.27633>.Percutaneous
- 759 Mayer-Barber, K. D., & Barber, D. L. (2015). Innate and adaptive cellular immune responses  
760 to Mycobacterium tuberculosis infection. In *Cold Spring Harbor Perspectives in*  
761 *Medicine* (Vol. 5). <https://doi.org/10.1101/cshperspect.a018424>
- 762 Mayer-Barber, K. D., Barber, D. L., Shenderov, K., White, S. D., Wilson, M. S., Cheever, A.,  
763 ... Sher, A. (2010). Cutting Edge: Caspase-1 Independent IL-1 $\beta$  Production Is Critical  
764 for Host Resistance to Mycobacterium tuberculosis and Does Not Require TLR  
765 Signaling In Vivo . *The Journal of Immunology*, 184(7), 3326–3330.  
766 <https://doi.org/10.4049/jimmunol.0904189>
- 767 Mcdonough, K. A., Kress, Y., & Bloom, B. R. (1993). Pathogenesis of Tuberculosis :  
768 Interaction of Mycobacterium tuberculosis with Macrophages. *Infection and Immunity*,  
769 61(7), 2763–2773.
- 770 Muruganandah, V., Sathkumara, H. D., Navarro, S., & Kupz, A. (2018). A Systematic  
771 Review: The Role of Resident Memory T Cells in Infectious Diseases and Their  
772 Relevance for Vaccine Development. *Frontiers in Immunology*, 9(July).  
773 <https://doi.org/10.3389/fimmu.2018.01574>
- 774 Mwandumba, H. C., Russell, D. G., Nyirenda, M. H., Anderson, J., White, S. A., Molyneux,  
775 M. E., & Squire, S. B. (2004). Mycobacterium tuberculosis Resides in Nonacidified  
776 Vacuoles in Endocytically Competent Alveolar Macrophages from Patients with  
777 Tuberculosis and HIV Infection 1. *The Journal of Immunology*.
- 778 Myrvik, Q. N., Leake, E. S., & Wright, M. J. (1984). Disruption of phagosomal membranes by  
779 the H37Rv strain of Mycobacterium tuberculosis. A correlate of virulence. *Am Rev*  
780 *Respir Dis*, 129(2), 322–328.

- 781 Pym, A. S., Brodin, P., Majlessi, L., Brosch, R., Demangel, C., Williams, A., ... Cole, S. .  
782 (2003). Recombinant BCG exporting ESAT-6 confers enhanced protection against  
783 tuberculosis. *Nature Medicine*, 9(5), 533–539. <https://doi.org/10.1038/nm>
- 784 Queval, C. J., Brosch, R., & Simeone, R. (2017). The Macrophage : A Disputed Fortress in  
785 the Battle against Mycobacterium tuberculosis. *Frontiers in Microbiology*, pp. 1–11.  
786 <https://doi.org/10.3389/fmicb.2017.02284>
- 787 Quigley, J., Hughitt, V. K., Velikovskiy, C. A., Mariuzza, R. A., El-Sayed, N. M., & Briken, V.  
788 (2017). The cell wall lipid PDIM contributes to phagosomal escape and host cell exit of  
789 Mycobacterium tuberculosis. *MBio*, 8(2), 1–12. <https://doi.org/10.1128/mBio.00148-17>
- 790 Rothchild, A. C., Olson, G. S., Nemeth, J., Amon, L. M., Mai, D., Gold, E. S., ... Aderem, A.  
791 (2019). Alveolar macrophages generate a non-canonical NRF2-driven transcriptional  
792 response to Mycobacterium tuberculosis in vivo. *Science Immunology*, 4(37).  
793 <https://doi.org/10.1016/j.physbeh.2017.03.040>
- 794 Russell, D. G., Mwandumba, H. C., & Rhoades, E. E. (2002). Mycobacterium and the coat of  
795 many lipids. *Journal of Cell Biology*, 158(3), 421–426.  
796 <https://doi.org/10.1083/jcb.200205034>
- 797 Russell, D. G., Vanderven, B., Glennie, S., Mwandumba, H., & Heyderman, R. (2009). The  
798 macrophage marches on its phagosome: dynamic assays of phagosome function. *Nat*  
799 *Rev Immunol*, 9(8), 594–600. <https://doi.org/10.1038/nri2591>.The
- 800 Samstein, M., Schreiber, H. A., Leiner, I. M., Sušac, B., Glickman, M. S., & Pamer, E. G.  
801 (2013). Essential yet limited role for CCR2+ inflammatory monocytes during  
802 Mycobacterium tuberculosis-specific T cell priming. *ELife*.  
803 <https://doi.org/10.7554/eLife.01086>
- 804 Sayes, F., Blanc, C., Ates, L. S., Deboosere, N., Orgeur, M., Le Chevalier, F., ... Majlessi, L.  
805 (2018). Multiplexed Quantitation of Intraphagocyte Mycobacterium tuberculosis

- 806           Secreted Protein Effectors. *Cell Reports*, 23(4), 1072–1084.  
807           <https://doi.org/10.1016/j.celrep.2018.03.125>
- 808   Sharma, R., Lahiri, R., Scollard, D. M., Pena, M., Williams, D. L., Adams, L. B., ... Truman,  
809           R. W. (2013). The armadillo: A model for the neuropathy of leprosy and potentially other  
810           neurodegenerative diseases. *DMM Disease Models and Mechanisms*, 6(1), 19–24.  
811           <https://doi.org/10.1242/dmm.010215>
- 812   Simeone, R., Bobard, A., Lippmann, J., Bitter, W., Majlessi, L., Brosch, R., & Enninga, J.  
813           (2012). Phagosomal rupture by *Mycobacterium tuberculosis* results in toxicity and host  
814           cell death. *PLoS Pathogens*, 8(2). <https://doi.org/10.1371/journal.ppat.1002507>
- 815   Simeone, R., Sayes, F., Song, O., Gröschel, M. I., & Brodin, P. (2015). Cytosolic Access of  
816           *Mycobacterium tuberculosis* : Critical Impact of Phagosomal Acidification Control and  
817           Demonstration of Occurrence In Vivo. *PLOS Pathogens*, 1–24.  
818           <https://doi.org/10.1371/journal.ppat.1004650>
- 819   Srinivasan, L., Gurses, S. A., Hurley, B. E., Miller, J. L., Karakousis, P. C., & Briken, V.  
820           (2016). Identification of a Transcription Factor That Regulates Host Cell Exit and  
821           Virulence of *Mycobacterium tuberculosis*. *PLoS Pathogens*, 12(5), 1–29.  
822           <https://doi.org/10.1371/journal.ppat.1005652>
- 823   Stamm, L. M., Morisaki, J. H., Gao, L. Y., Jeng, R. L., McDonald, K. L., Roth, R., ... Brown,  
824           E. J. (2003). *Mycobacterium marinum* Escapes from Phagosomes and Is Propelled by  
825           Actin-based Motility. *Journal of Experimental Medicine*, 198(9), 1361–1368.  
826           <https://doi.org/10.1084/jem.20031072>
- 827   Sturgill-Koszycki, S., Schlesinger, P. H., Chakraborty, P., Haddix, P. ., Collins, H. ., Fok, A. .,  
828           ... Russell, D. G. (1994). Lack of acidification in *Mycobacterium* phagosomes produced  
829           by exclusion of the vesicular proton-ATPase. *Science*, 263(5147), 678–681.
- 830   Sundaramurthy, V., Korf, H., Singla, A., Scherr, N., Nguyen, L., Ferrari, G., ... Pieters, J.

- 831 (2017). Survival of Mycobacterium tuberculosis and Mycobacterium bovis BCG in  
832 lysosomes in vivo. *Microbes and Infection*, 19(11), 515–526.  
833 <https://doi.org/10.1016/j.micinf.2017.06.008>
- 834 van der Wel, N. N., Fluitsma, D. M., Dascher, C. C., Brenner, M. B., & Peters, P. J. (2005).  
835 Subcellular localization of mycobacteria in tissues and detection of lipid antigens in  
836 organelles using cryo-techniques for light and electron microscopy. *Current Opinion in*  
837 *Microbiology*, 8(3), 323–330. <https://doi.org/10.1016/j.mib.2005.04.014>
- 838 van der Wel, N. N., Hava, D., Houben, D., Fluitsma, D., van Zon, M., Pierson, J., ... Peters,  
839 P. J. (2007). M . tuberculosis and M . leprae Translocate from the Phagolysosome to the  
840 Cytosol in Myeloid Cells. *Cell*, 1287–1298. <https://doi.org/10.1016/j.cell.2007.05.059>
- 841 van Leeuwen, L. M., Boot, M., Kuijl, C., Picavet, D. I., van Stempvoort, G., van der Pol, S. M.  
842 A., ... Bitter, W. (2018). Mycobacteria employ two different mechanisms to cross the  
843 blood–brain barrier. *Cellular Microbiology*, 20(9), 1–17.  
844 <https://doi.org/10.1111/cmi.12858>
- 845 Vandal, O. H., Nathan, C. F., & Ehrt, S. (2009). Acid resistance in Mycobacterium  
846 tuberculosis. *Journal of Bacteriology*, 191(15), 4714–4721.  
847 <https://doi.org/10.1128/JB.00305-09>
- 848 Vaziri, F., & Brosch, R. (2019). ESX / Type VII Secretion Systems — An Important Way Out  
849 for Mycobacterial Proteins. *Microbiol Spectrum*, 7(4):PSIB-(PSIB-0029-2019).  
850 <https://doi.org/10.1128/microbiolspec.PSIB-0029-2019.Correspondence>
- 851 Vieira, O. V., Botelho, R. J., & Grinstein, S. (2002). Phagosome maturation: aging gracefully.  
852 *Biochemical Journal*, 366(3), 689–704. <https://doi.org/10.1042/bj20020691>
- 853 Wassermann, R., Gulen, M. F., Sala, C., Perin, S. G., Lou, Y., Rybniker, J., ... Ablasser, A.  
854 (2015). Mycobacterium tuberculosis Differentially Activates cGAS- and Inflammasome-  
855 Dependent Intracellular Immune Responses through ESX-1. *Cell Host and Microbe*,



- 856 17(6), 799–810. <https://doi.org/10.1016/j.chom.2015.05.003>
- 857 Watson, R. O., Bell, S. L., MacDuff, D. A., Kimmey, J. M., Diner, E. J., Olivas, J., ... Cox, J.  
858 S. (2015). The cytosolic sensor cGAS detects *Mycobacterium tuberculosis* DNA to  
859 induce type I interferons and activate autophagy. *Cell Host Microbe*, 17(6), 811–819.  
860 <https://doi.org/10.1016/j.chom.2015.05.003>
- 861 Weerdenburg, E. M., Abdallah, A. M., Mitra, S., De Punder, K., Van der Wel, N. N., Bird, S.,  
862 ... Van der Sar, A. M. (2012). ESX-5-deficient *Mycobacterium marinum* is hypervirulent  
863 in adult zebrafish. *Cellular Microbiology*, 14(5), 728–739. [https://doi.org/10.1111/j.1462-](https://doi.org/10.1111/j.1462-5822.2012.01755.x)  
864 [5822.2012.01755.x](https://doi.org/10.1111/j.1462-5822.2012.01755.x)
- 865 Wong, D., Bach, H., Sun, J., Hmama, Z., & Av-gay, Y. (2011). *Mycobacterium tuberculosis*  
866 protein tyrosine to inhibit phagosome acidification. *PNAS*, 108(48), 19371–19376.  
867 <https://doi.org/10.1073/pnas.1109201108>
- 868 World Health Organization. (2019). *Global Tuberculosis Report 2019: Fact sheet*.  
869 <https://doi.org/10.1017/CBO9781107415324.004>
- 870 Yamada, H., Mizuno, S., Horai, R., Iwakura, Y., & Sugawara, I. (2000). Protective role of  
871 interleukin-1 in mycobacterial infection in IL-1 alpha/beta double knockout mice. *Lab*  
872 *Invest*, 80, 759–767.
- 873 Young, D. C., Layre, E., Pan, S., Tapley, A., Adamson, J., Wu, Z., ... Moody, D. B. (2015).  
874 chemical markers of *Mycobacterium tuberculosis* infection. *Chem Biol.*, 22(4), 516–526.  
875 <https://doi.org/10.1016/j.chembiol.2015.03.015>
- 876
- 877
